# Supplementary material for: Inhibitory Effect of Methotrexate on Rheumatoid Arthritis Inflammation and Comprehensive Metabolomics Analysis Using Ultra-Performance Liquid Chromatography-Quadrupole Time of Flight-Mass Spectrometry (UPLC-Q/TOF-MS)
Source: PubMed Central journal article supplement (PMC6212996; doi:10.3390/ijms19102894), 2018-09-23
Supplement: ijms-19-02894-s001.pdf [file ijms-19-02894-s001.pdf]

## SUPPLEMENTARY MATERIALS

# **Inhibitory Effect of Methotrexate on Rheumatoid Arthritis Inflammation and Comprehensive Metabolomics Analysis Using UPLC-Q/TOF-MS**

**Zhiqiang Pang<sup>1</sup>, Guoqiang Wang<sup>1</sup>, Nan Ran<sup>1</sup>, Hongqiang Lin<sup>2</sup>, Ziyang Wang<sup>1</sup>, Xuewa Guan<sup>1</sup>, Yuze Yuan<sup>1</sup>, Keyong Fang<sup>3</sup>, Jinping Liu<sup>2</sup> and Fang Wang<sup>1, \*</sup>**

<sup>1</sup> Department of Pathogen Biology, College of Basic Medical Sciences, Jilin University, Changchun, China; pangzq2812@mails.jlu.edu.cn (Z.P.); wanggq14@mails.jlu.edu.cn (G.W.); rannan17@mails.jlu.edu.cn (N.R.); zwy16@mails.jlu.edu.cn (Z.W.); guanxw15@mails.jlu.edu.cn (X.G.); yuanyz17@mails.jlu.edu.cn (Y.Y.)

<sup>2</sup> Research Center of Natural Drug, School of Pharmaceutical Sciences, Jilin University, Changchun, China; linhq17@mails.jlu.edu.cn (H.L.); liujp@jlu.edu.cn (J.L.)

<sup>3</sup> Department of Pharmacology, College of Basic Medical Sciences, Jilin University, Changchun, China; fangky15@mails.jlu.edu.cn (K.F.)

\* Correspondence: wf@jlu.edu.cn; Tel.: +86-431-85168587

**Table S1** Investigation on the stability and suitability of chromatographic and spectrometric system

| Modes | NO | Retention Time/min | m/z       | m/z in SPECTRUM      |                  | RT of CHROMATOGRAM   |                  | PA of CHROMATOGRAM   |                  |
|-------|----|--------------------|-----------|----------------------|------------------|----------------------|------------------|----------------------|------------------|
|       |    |                    |           | Repeatability (RSD%) | Precision (RSD%) | Repeatability (RSD%) | Precision (RSD%) | Repeatability (RSD%) | Precision (RSD%) |
| ESI+  | 1  | 0.5788             | 203.0535  | 0.0006               | 0.0003           | 0.0012               | 0.0000           | 2.7081               | 5.2620           |
|       | 2  | 12.7089            | 274.2727  | 0.0000               | 0.0001           | 0.0001               | 0.0000           | 1.1709               | 4.6712           |
|       | 3  | 9.7526             | 347.2203  | 0.0001               | 0.0002           | 0.0215               | 0.1777           | 3.1600               | 2.9135           |
|       | 4  | 27.1474            | 416.2668  | 0.0001               | 0.0001           | 0.1037               | 0.0554           | 2.2565               | 3.1535           |
|       | 5  | 20.6052            | 524.3746  | 0.0002               | 0.0002           | 0.0052               | 0.0000           | 3.4421               | 5.1513           |
|       | 6  | 27.6191            | 663.4358  | 0.0001               | 0.0001           | 0.2473               | 0.6784           | 2.1183               | 5.7450           |
|       | 7  | 27.6164            | 708.5138  | 0.0000               | 0.0002           | 0.1245               | 0.6980           | 1.7551               | 3.8983           |
|       | 8  | 27.1398            | 803.5465  | 0.0000               | 0.0001           | 0.0120               | 0.0640           | 2.7071               | 5.7567           |
|       | 9  | 17.9762            | 991.6768  | 0.0004               | 0.0008           | 0.1020               | 0.0835           | 3.9924               | 2.3065           |
|       | 10 | 16.9942            | 1063.6670 | 0.0001               | 0.0004           | 0.0047               | 0.0882           | 1.6940               | 5.6129           |
| ESI-  | 1  | 0.6089             | 215.0353  | 0.0000               | 0.0002           | 0.0034               | 0.0000           | 1.3124               | 1.0261           |
|       | 2  | 24.8625            | 355.1600  | 0.0003               | 0.0002           | 0.0149               | 0.1612           | 2.2078               | 5.6903           |
|       | 3  | 18.1080            | 480.3099  | 0.0001               | 0.0000           | 0.1674               | 0.2611           | 1.6232               | 4.9489           |
|       | 4  | 17.5954            | 504.3313  | 0.0002               | 0.0001           | 0.0182               | 0.2048           | 3.4140               | 3.3804           |
|       | 5  | 17.0883            | 588.3303  | 0.0001               | 0.0002           | 0.2045               | 0.2045           | 5.6507               | 3.6115           |
|       | 6  | 20.7359            | 640.2898  | 0.0002               | 0.0002           | 0.1934               | 0.1934           | 0.1115               | 2.6260           |
|       | 7  | 20.7430            | 711.2649  | 0.0000               | 0.0004           | 0.3050               | 0.3454           | 1.6040               | 5.0106           |
|       | 8  | 10.3365            | 850.9446  | 0.0002               | 0.0002           | 0.0169               | 0.3832           | 1.1308               | 5.3971           |
|       | 9  | 0.5257             | 928.8245  | 0.0000               | 0.0002           | 0.0000               | 0.0000           | 0.1076               | 4.1797           |
|       | 10 | 18.1024            | 1035.6513 | 0.0000               | 0.0001           | 0.0132               | 0.2611           | 1.0888               | 5.0841           |

**Table S2** Primers designed for qPCR in animal and cell experiments

| Species             | Genes              | Forward Primers           | Reverse Primers           |
|---------------------|--------------------|---------------------------|---------------------------|
| Rat                 | NLRP3              | CAGACCTCCAAGACCACGACTG    | CATCCGCAGCCAATGAACAGAG    |
|                     | Caspase-1          | TGCCTGGTCTTGTGACTTGGAG    | ATGTCCTGGGAAGAGGTAGAAAACG |
|                     | NF- $\kappa$ B p65 | CTCACCGGCCCTCATCCACAT     | TGGCTAATGGCTTGCTCCAG      |
|                     | TNF- $\alpha$      | GGCATGGATCTCAAAGACAACC    | AAATCGGCTGACGGTGTGG       |
|                     | IL-1 $\beta$       | TCTCACAGCAGCATCTCGAC      | GGTCGTCATCATCCCACGAG      |
|                     | IL-18              | CGCAGTAATACGGAGCATAAATGAC | GGTAGACATCCTTCCATCCTTCAC  |
|                     | $\beta$ -actin     | ACCACCATGTACCCAGGCATT     | CCACACAGAGTACTTGCCTCA     |
| Mice<br>(RAW 264.7) | NLRP3              | ATTACCCGCCCGAGAAAGG       | TCGCAGCAAAGATCCACACAG     |
|                     | Caspase-1          | TGCCTGGTCTTGTGACTTGGAG    | ATGTCCTGGGAAGAGGTAGAAAACG |
|                     | NF- $\kappa$ B p65 | AGCTCAAGATCTGCCGAGTAA     | GCCTGGTCCCGTGAAATACA      |
|                     | TNF- $\alpha$      | GGCATGGATCTCAAAGACAACC    | AAATCGGCTGACGGTGTGG       |
|                     | IL-1 $\beta$       | TGAAAACACAGAAGTAACGTCCG   | CCCAGGAGGAAATTGTAATGGGA   |
|                     | IL-18              | AATCACTTCTCTTGGCCCA       | GTTGTACAGTGAAGTCGGCC      |
|                     | $\beta$ -actin     | AAGACCTCTATGCCAACACAGT    | AGCCAGAGCAGTAATCTCCTTC    |

**Table S3** MetaboAnalyst Results on Metabolic Pathways

|                                          | Total | Expected | Hits | Raw <i>P</i> | $-\log(P)$ | Holm adjust | FDR      | Impact  |
|------------------------------------------|-------|----------|------|--------------|------------|-------------|----------|---------|
| Arachidonic acid metabolism <sup>§</sup> | 36    | 0.48787  | 10   | 2.57E-12     | 26.687     | 2.08E-10    | 2.08E-10 | 0.40905 |
| Linoleic acid metabolism <sup>§</sup>    | 5     | 0.06776  | 4    | 1.20E-07     | 15.937     | 9.59E-06    | 4.85E-06 | 1       |
| Sphingolipid metabolism <sup>§</sup>     | 21    | 0.28459  | 3    | 0.0024081    | 6.0289     | 0.19024     | 0.06502  | 0.2807  |
| Starch and sucrose metabolism            | 23    | 0.3117   | 2    | 0.037171     | 3.2922     | 1           | 0.75272  | 0       |
| Galactose metabolism                     | 26    | 0.35235  | 2    | 0.046613     | 3.0659     | 1           | 0.75513  | 0.05678 |
| alpha-Linolenic acid metabolism          | 42    | 0.56919  | 2    | 0.10867      | 2.2194     | 1           | 1        | 0       |
| Biosynthesis of unsaturated fatty acids  | 9     | 0.12197  | 1    | 0.11588      | 2.1552     | 1           | 1        | 0       |
| Glycerophospholipid metabolism           | 30    | 0.40656  | 1    | 0.33878      | 1.0824     | 1           | 1        | 0.13889 |

§ Metabolic pathways significantly perturbed.

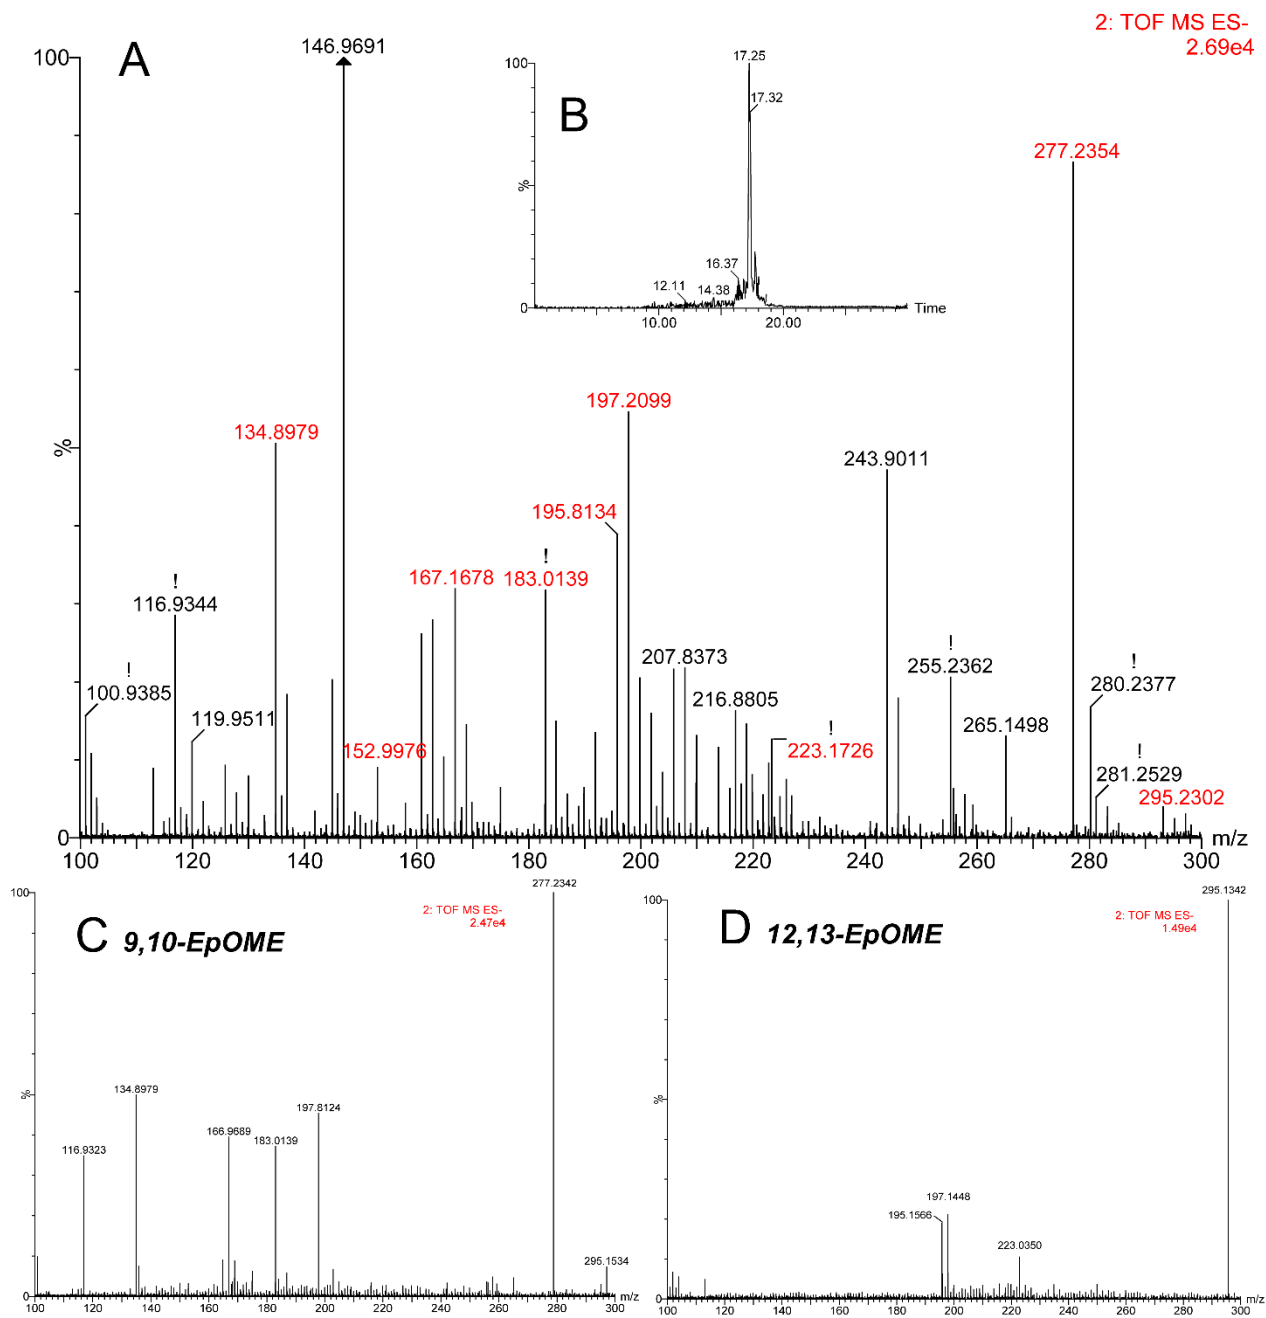

**Figure S1.** MS/MS spectra of the identified potential metabolic marker **S1** 9,10- & 12,13-EpOME (A) and the chromatographic peak of 9,10- & 12,13-EpOME (B). The reference standard chemical spectra including 9,10-EpOME (C), 12,13-EpOME (D) in experimental condition. The reference spectra from HMDB database with different voltage 20V (E) and 40V (F) for 9,10-EpOME and 20V (G) and 40V (H) for 12,13-EpOME.

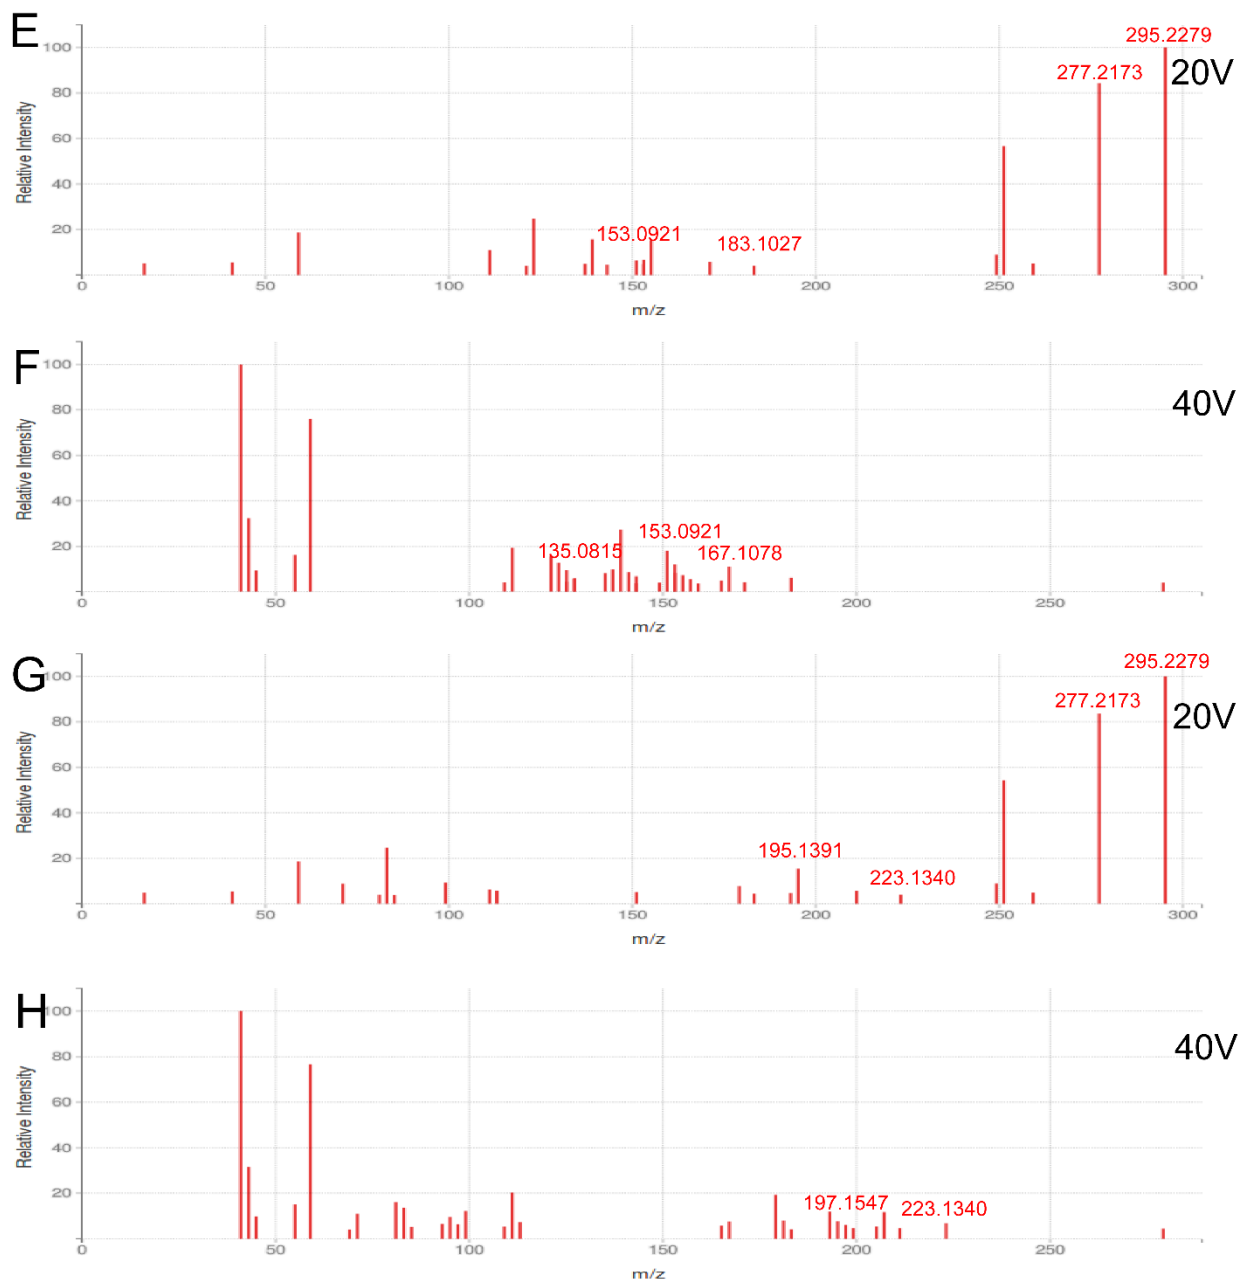

**Figure S1.** MS/MS spectra of the identified potential metabolic marker **S1** 9,10- & 12,13-EpOME (A) and the chromatographic peak of 9,10- & 12,13-EpOME (B). The reference standard chemical spectra including 9,10-EpOME (C), 12,13-EpOME (D) in experimental condition. The reference spectra from HMDB database with different voltage 20V (E) and 40V (F) for 9,10-EpOME and 20V (G) and 40V (H) for 12,13-EpOME.

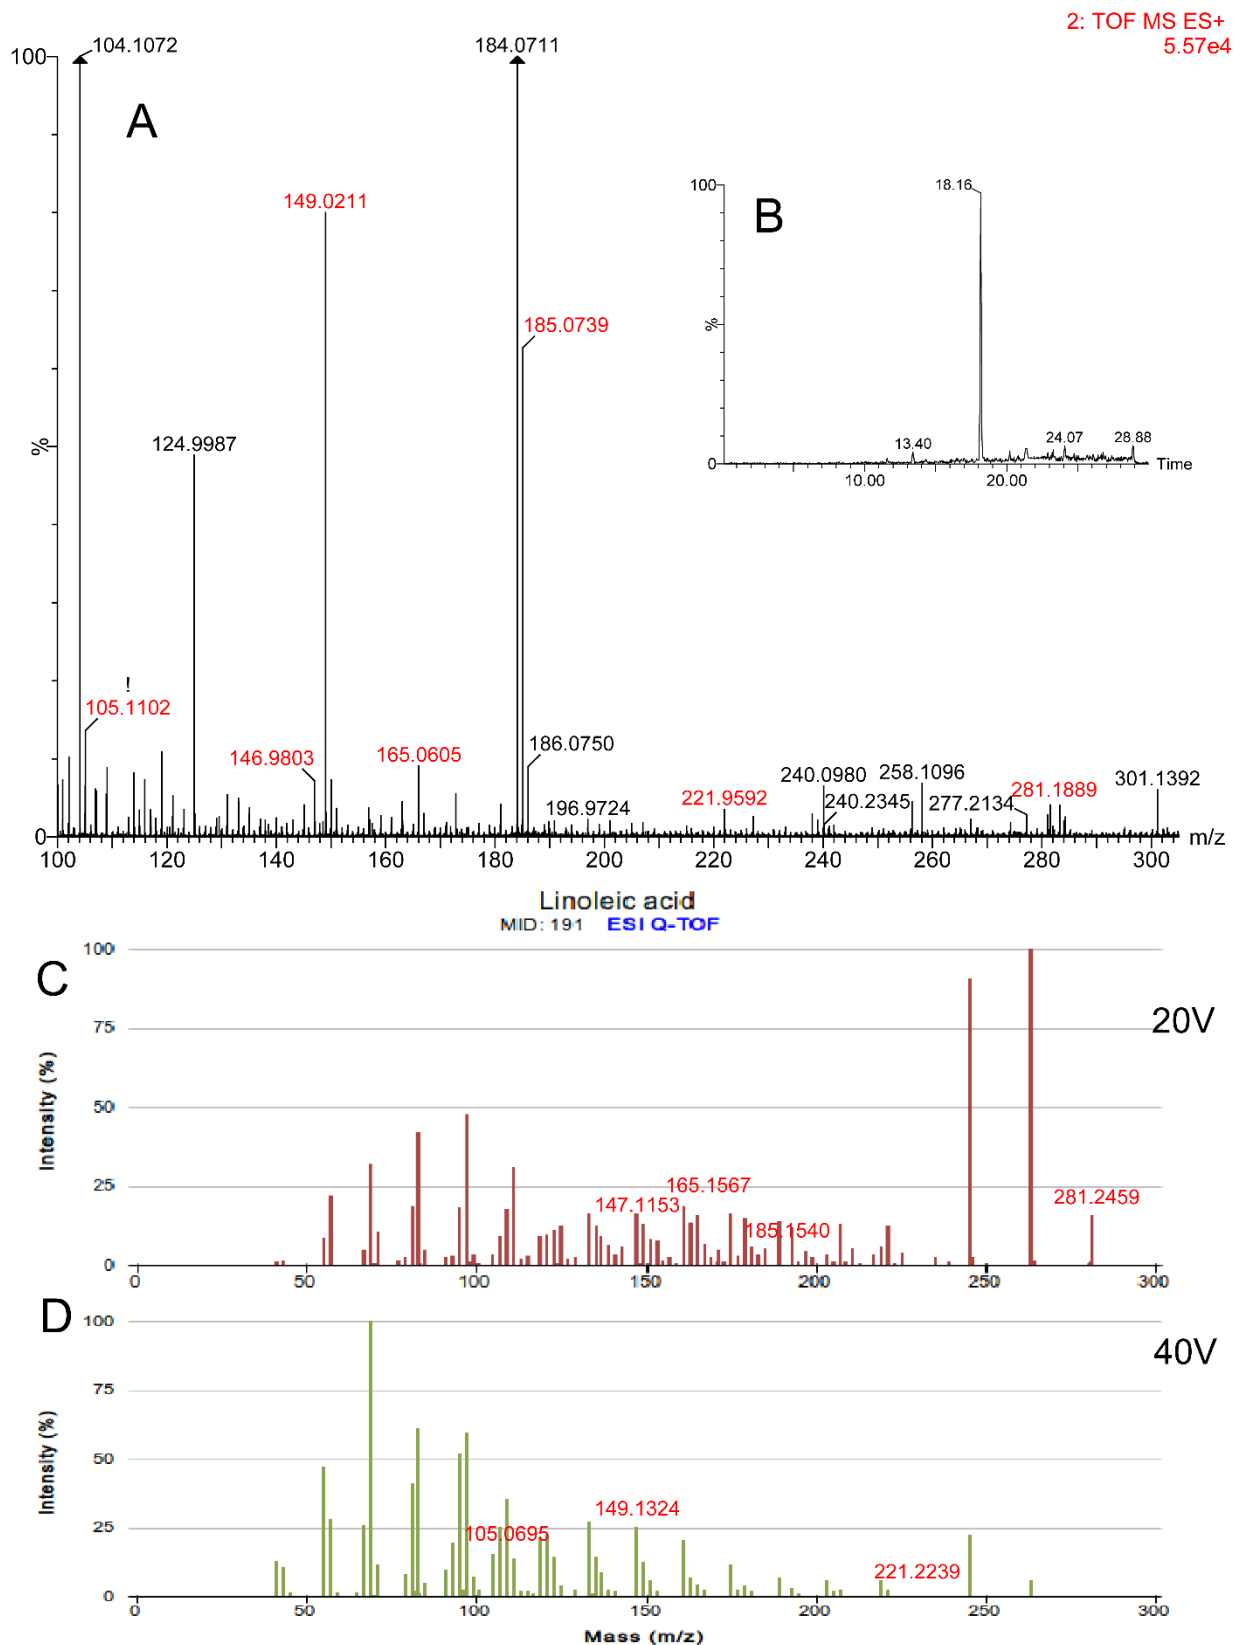

**Figure S2.** MS/MS spectra of the identified potential metabolic marker S2 Linoleic acid (A) and the chromatographic peak of Linoleic acid (B). The reference spectra from METLIN database with different voltage 20V (E) and 40V (F).

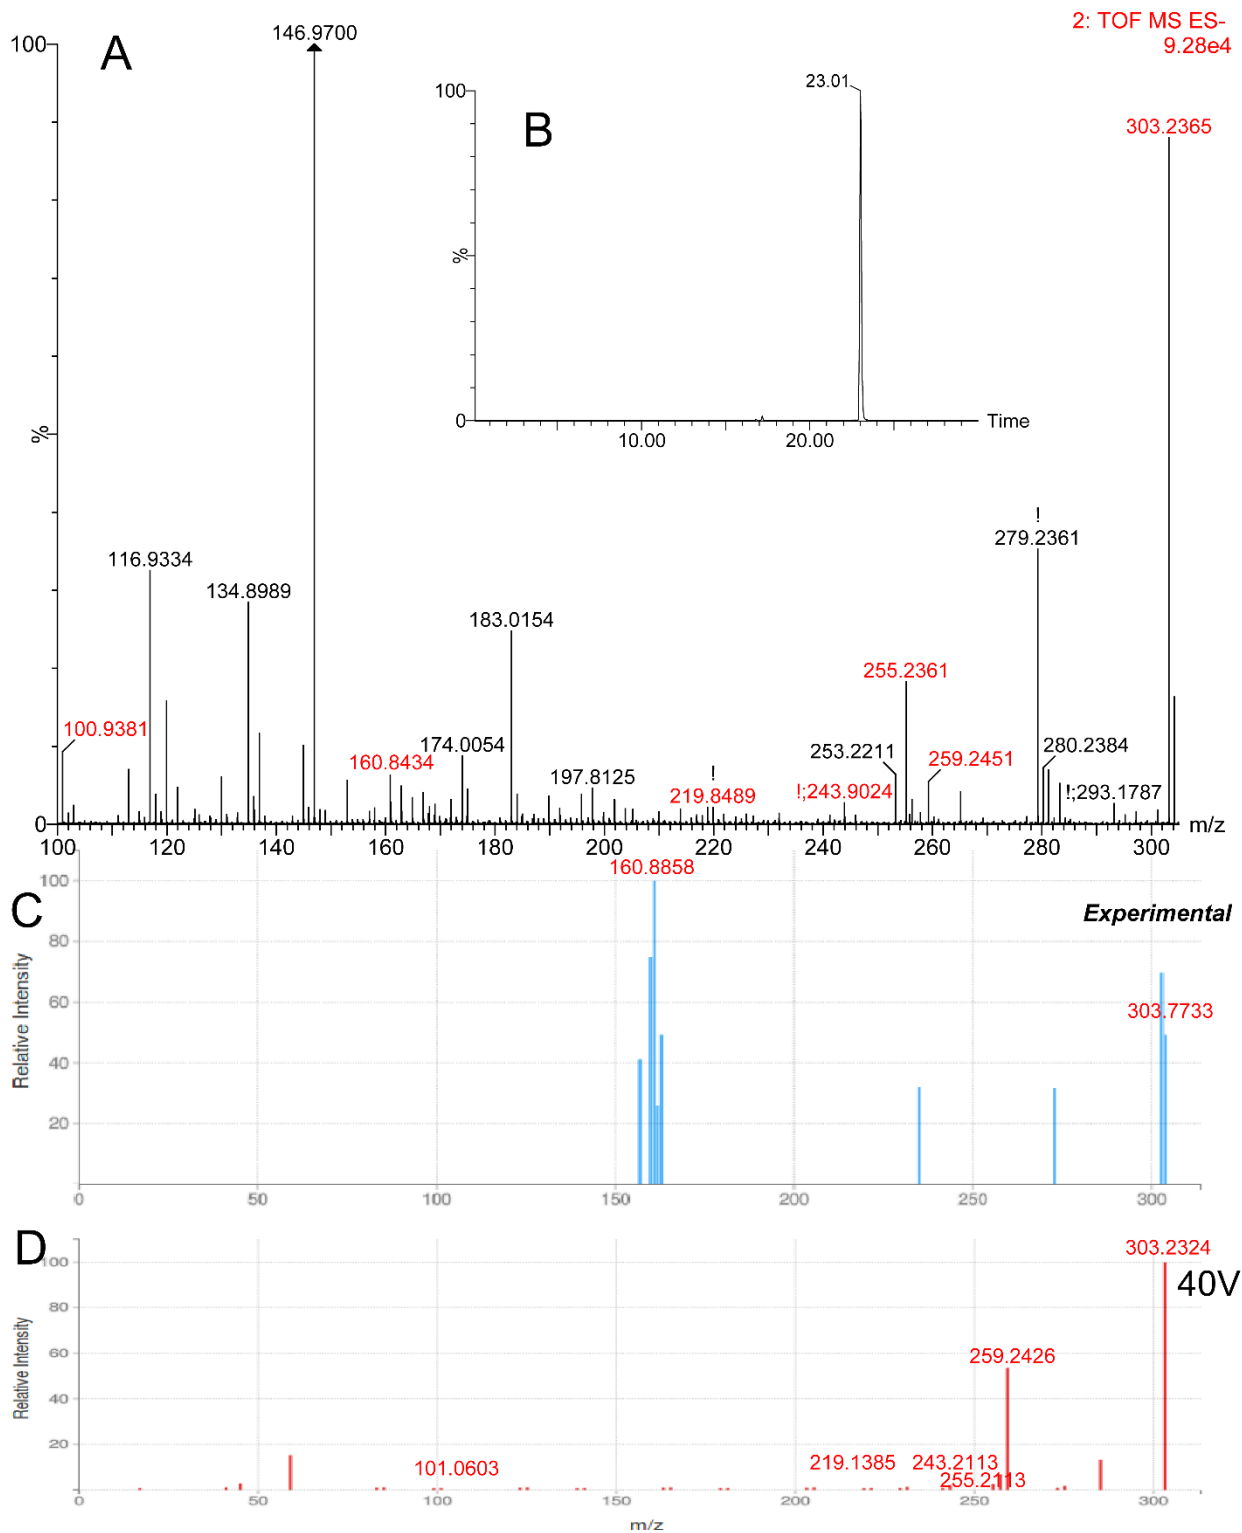

**Figure S3.** MS/MS spectra of the identified potential metabolic marker **S3** Arachidonic acid (A) and the chromatographic peak of Arachidonic acid (B). The reference spectra from HMDB database with in experimental condition (C) and voltage of 40V (D).



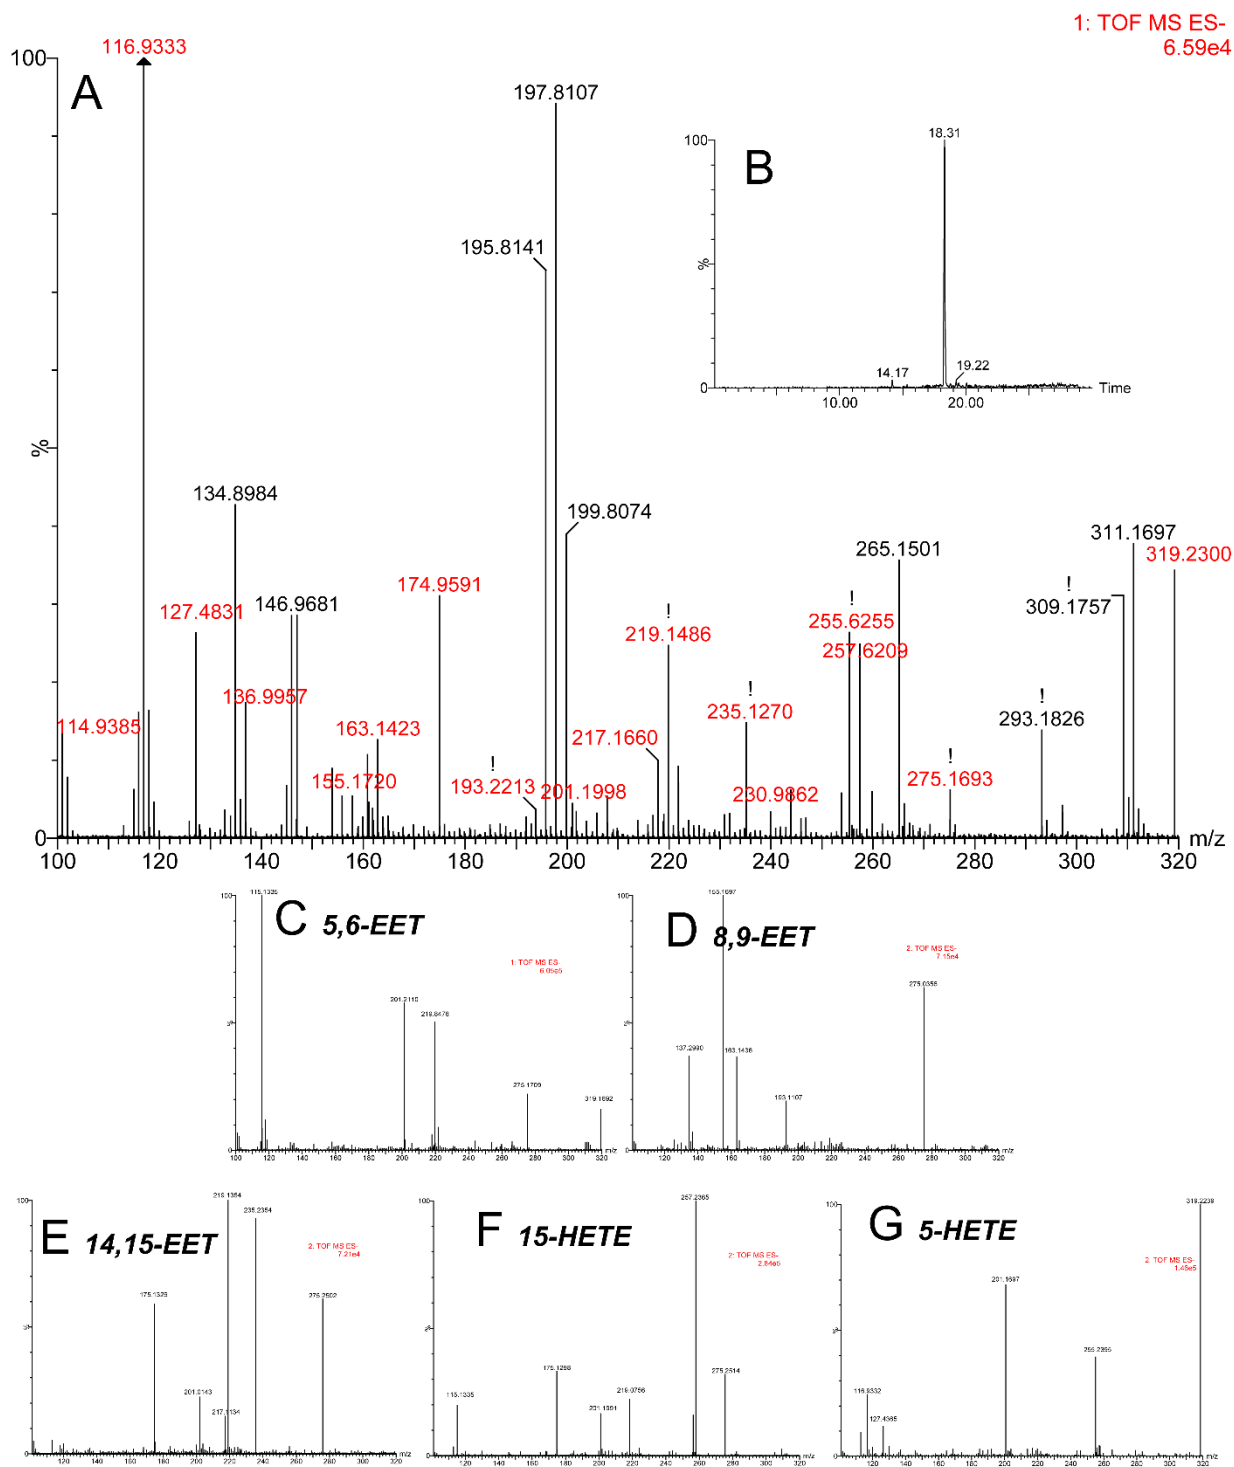

**Figure S4.** MS/MS spectra of the identified potential metabolic marker S4 EETs & HETEs (A) and the chromatographic peak of EETs & HETEs (B). The reference standard chemical spectra including 5,6-EET (C), 8,9-EET (D), 14,15-EET (E), 15-HETE (F) and 5-HETE (G) in experimental condition. The reference spectra from HMDB database with voltage 20V for 5,6-EET (H), 8,9-EET (I), 14,15-EET (J), 15-HETE (K) and 5-HETE (L).

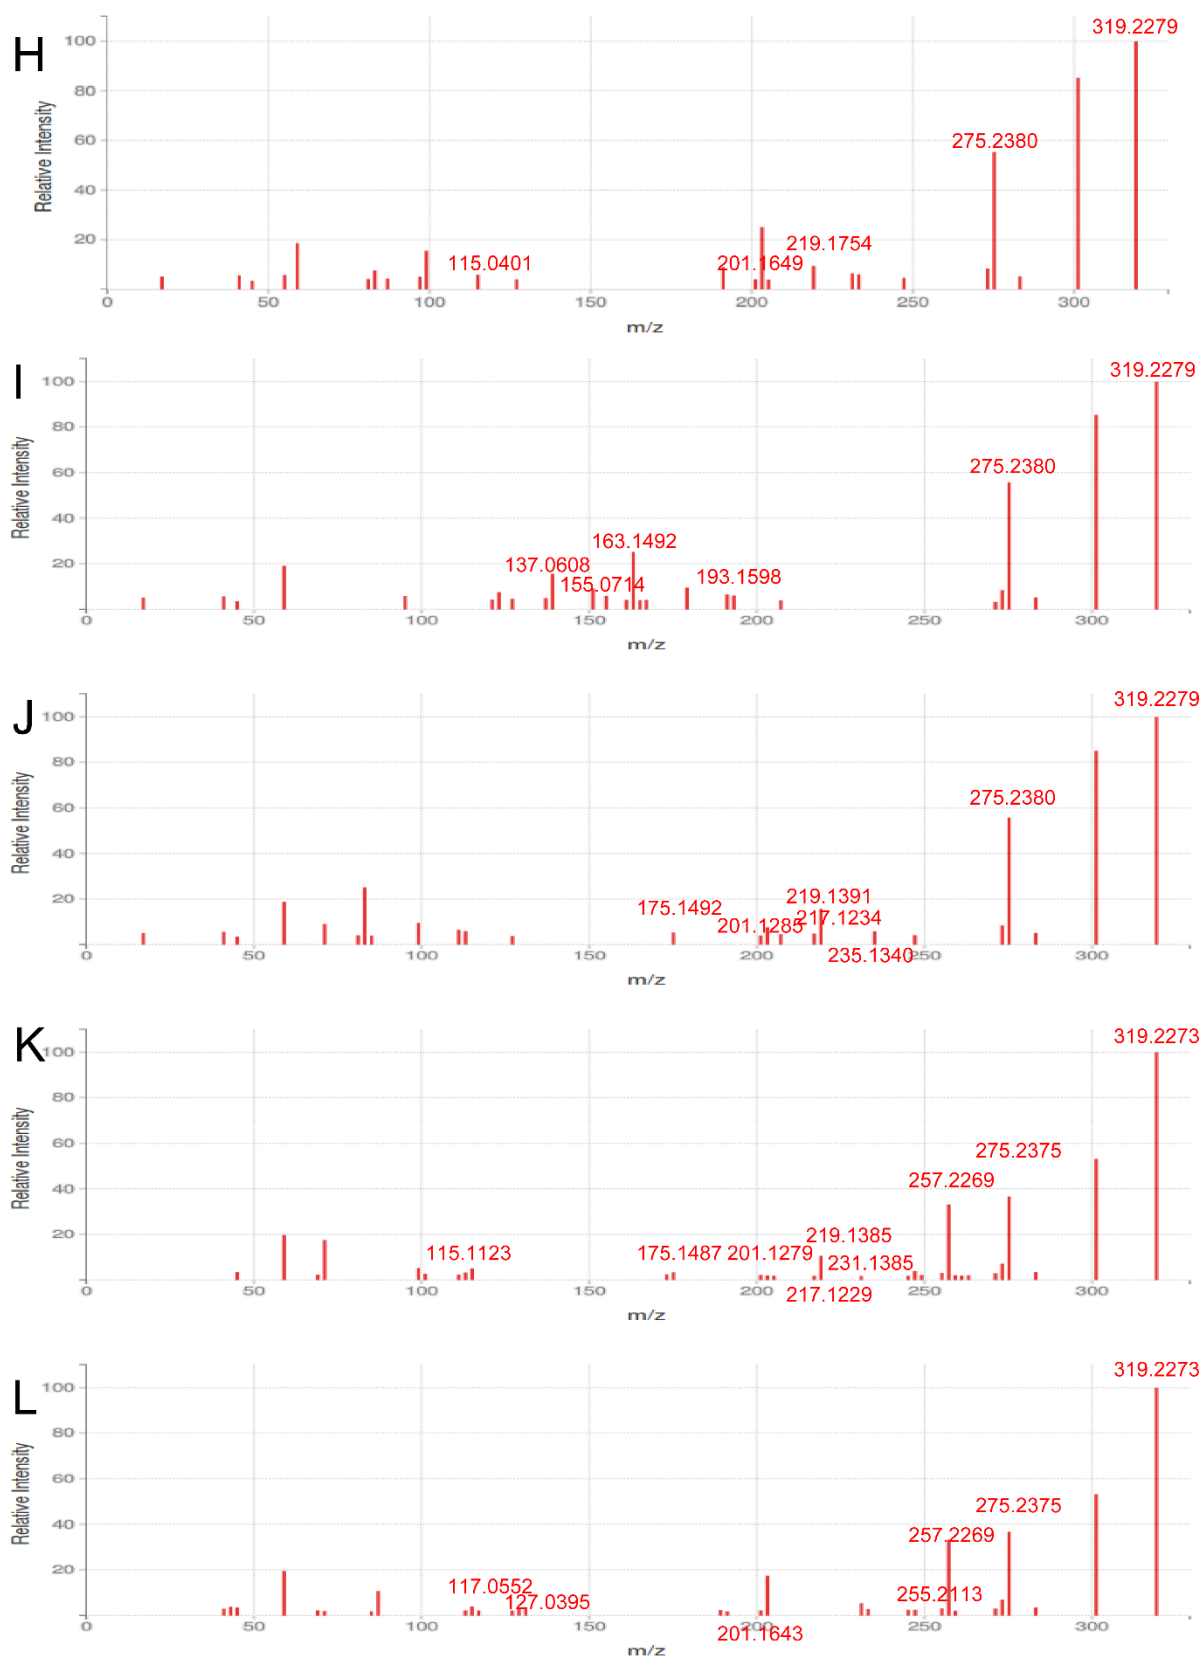

**Figure S4.** MS/MS spectra of the identified potential metabolic marker S4 EETs & HETEs (A) and the chromatographic peak of EETs & HETEs (B). The reference standard chemical spectra including 5,6-EET (C), 8,9-EET (D), 14,15-EET (E), 15-HETE (F) and 5-HETE (G) in experimental condition. The reference spectra from HMDB database with voltage 20V for 5,6-EET (H), 8,9-EET (I), 14,15-EET (J), 15-HETE (K) and 5-HETE (L).

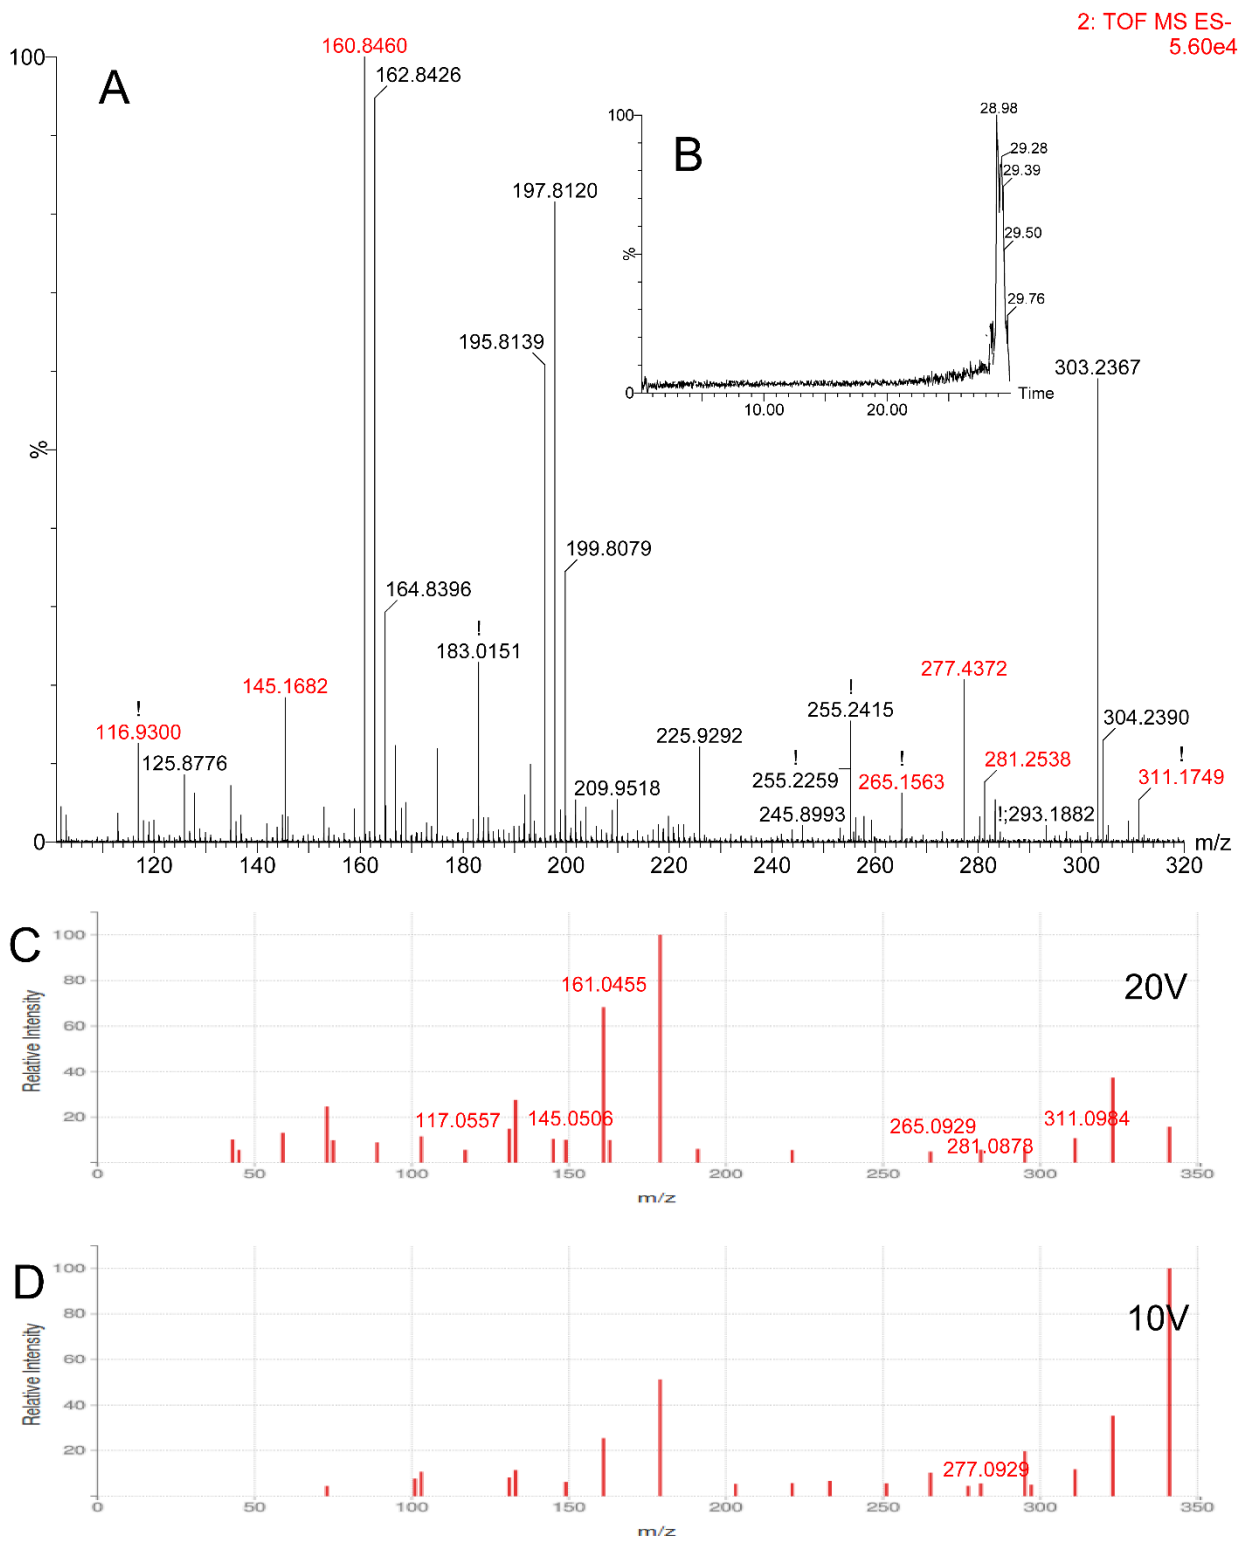

**Figure S5.** MS/MS spectra of the identified potential metabolic marker S5 Alpha-lactose (A) and the chromatographic peak of Alpha-lactose (B). The reference spectra from HMDB database with in voltage 20V (C) and voltage of 40V (D).

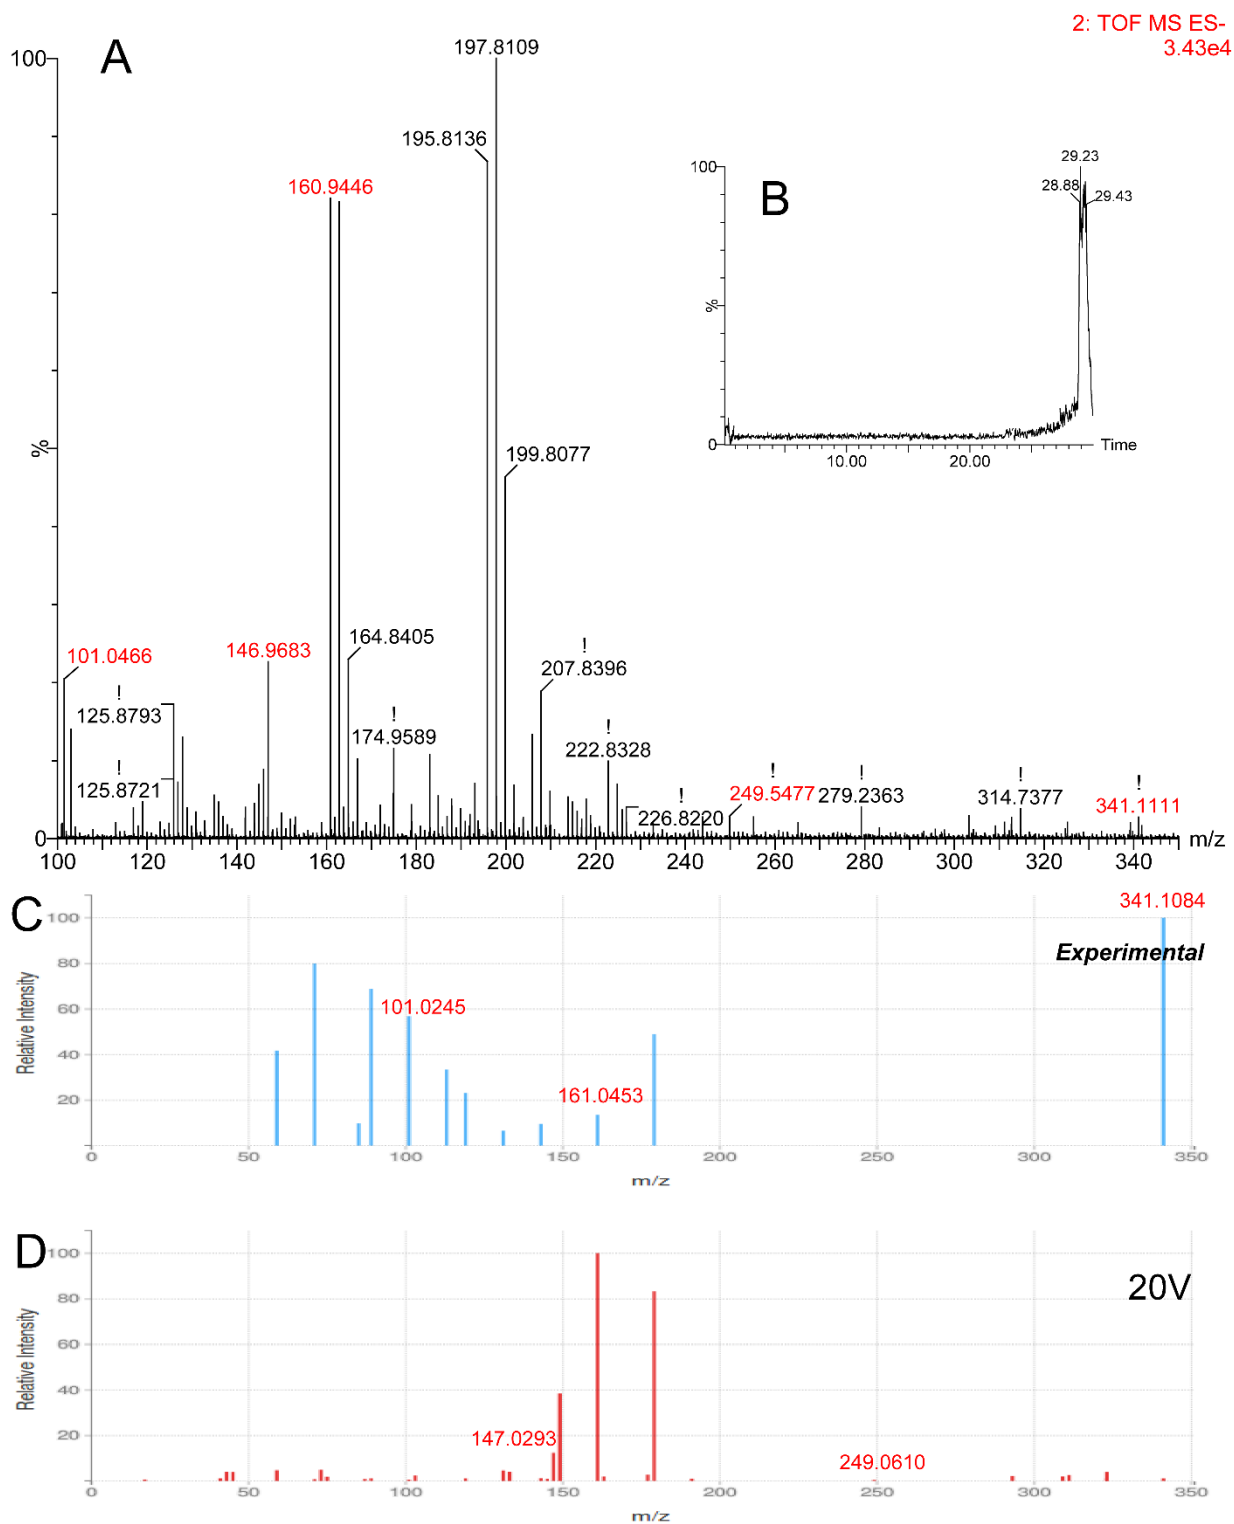

**Figure S6.** MS/MS spectra of the identified potential metabolic marker S6 Sucrose (A) and the chromatographic peak of Sucrose (B). The reference spectra from HMDB database with in voltage 20V (C) and voltage of 40V (D).

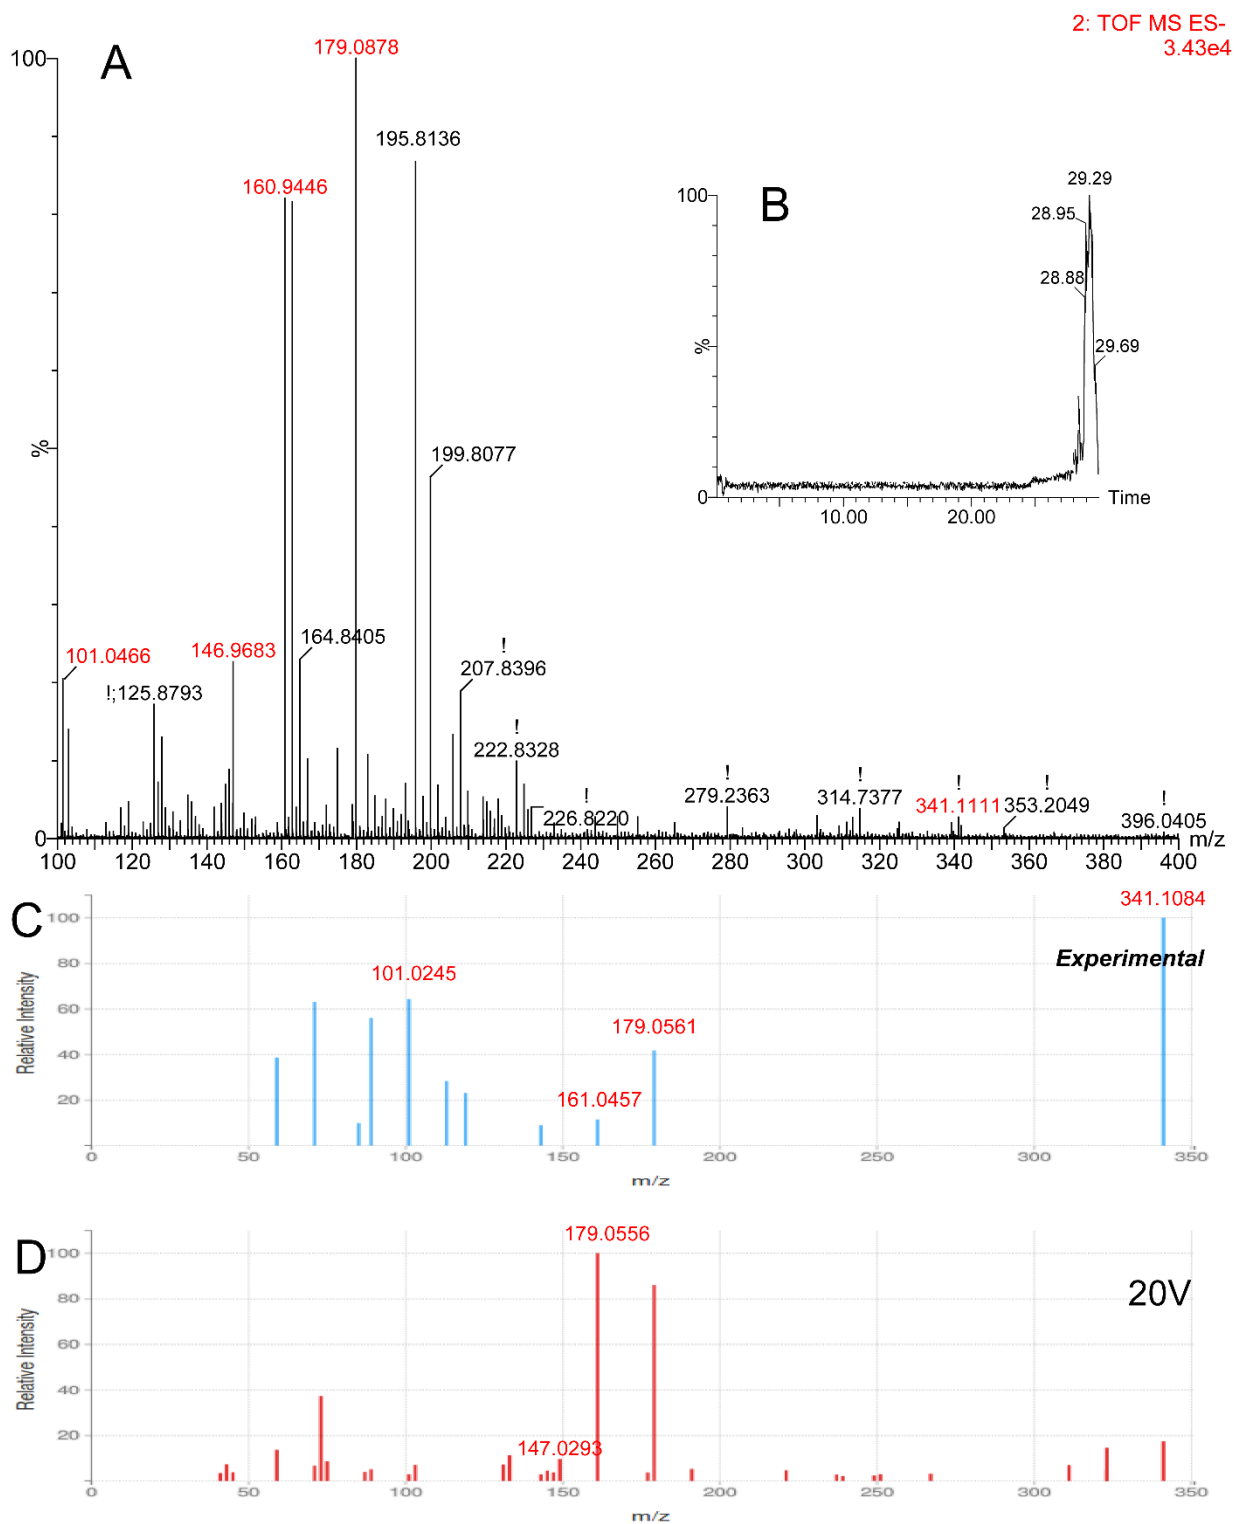

**Figure S7.** MS/MS spectra of the identified potential metabolic marker **S7** Trehalose (A) and the chromatographic peak of Trehalose (B). The reference spectra from HMDB database with in voltage 20V (C) and voltage of 40V (D).

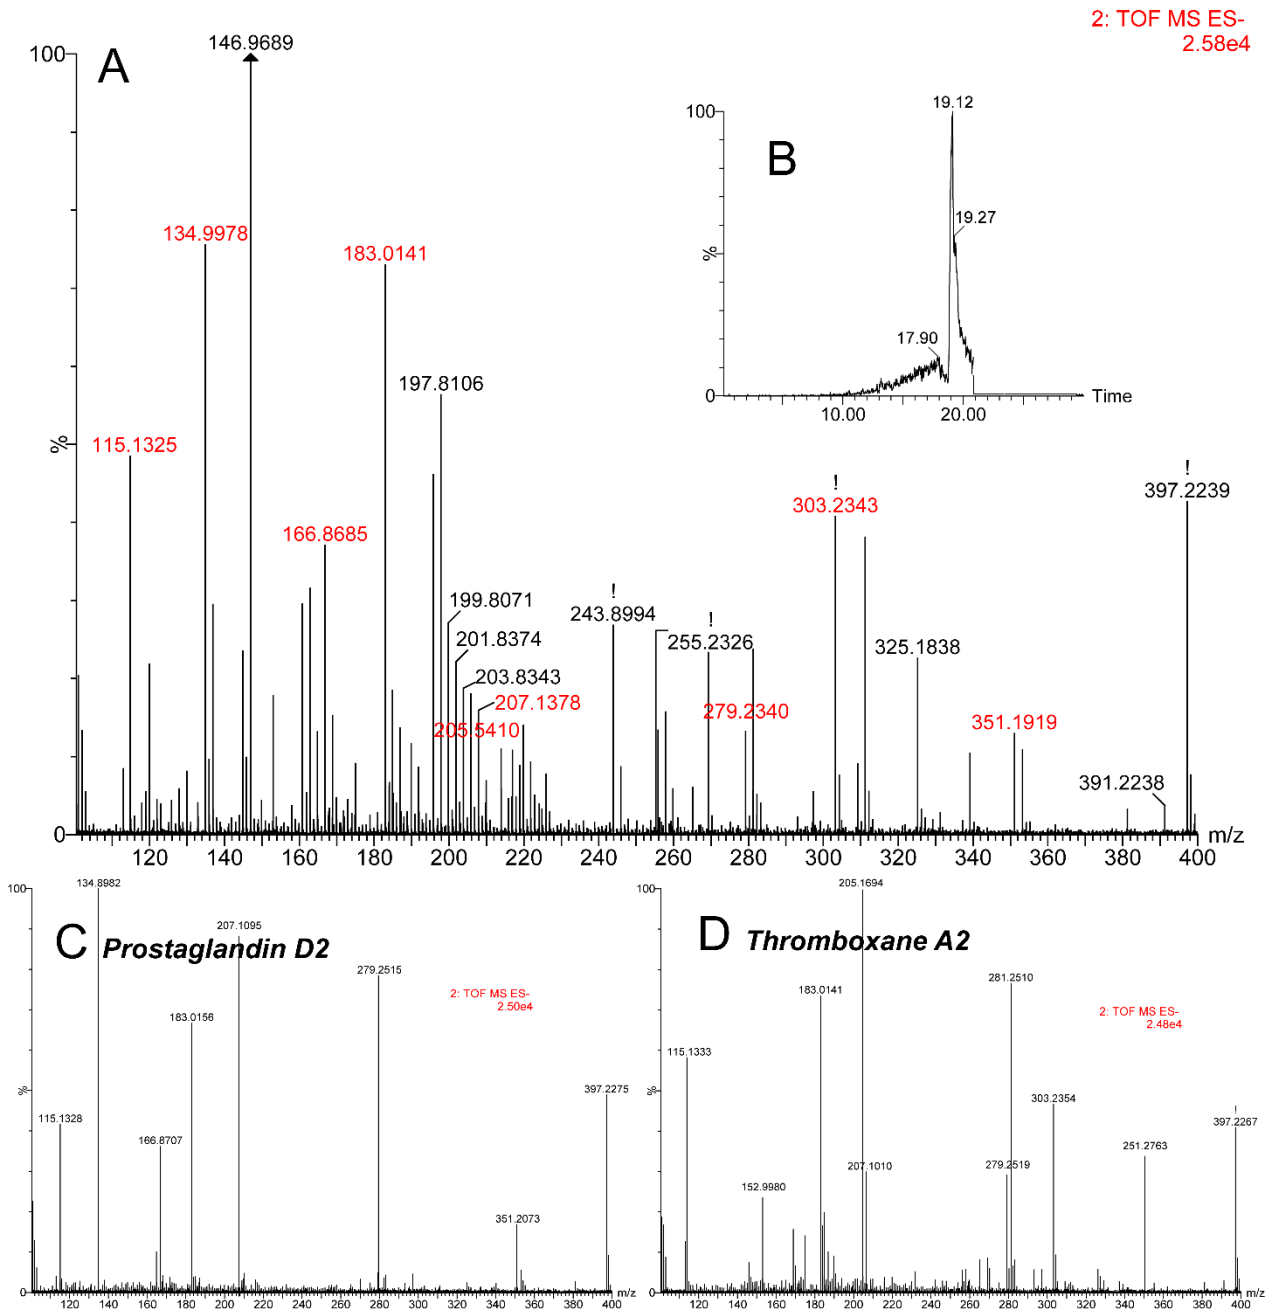

**Figure S8.** MS/MS spectra of the identified potential metabolic marker S8 Prostanoids (A) and the chromatographic peak of Prostanoids (B). The reference standard chemical spectra including Prostaglandin D2 (C) and Thromboxane (D) in experimental condition. The reference spectra from HMDB database with voltage 20V for Prostaglandin D2 (E), 40V for Prostaglandin D2 (F) and 20V for Thromboxane (G).

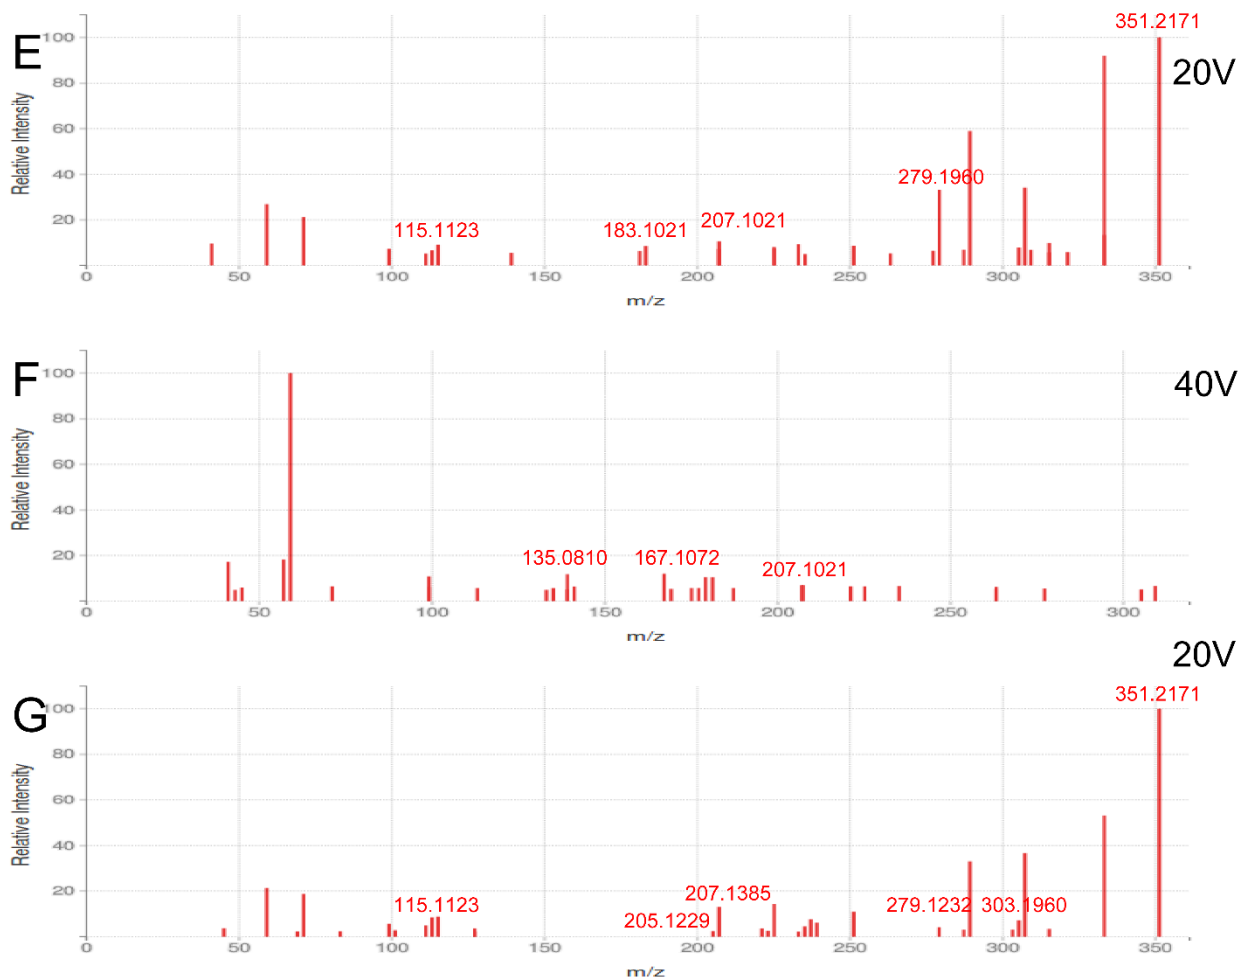

**Figure S8.** MS/MS spectra of the identified potential metabolic marker **S8** Prostanoids (A) and the chromatographic peak of Prostanoids (B). The reference standard chemical spectra including Prostaglandin D2 (C) and Thromboxane (D) in experimental condition. The reference spectra from HMDB database with voltage 20V for Prostaglandin D2 (E), 40V for Prostaglandin D2 (F) and 20V for Thromboxane (G).

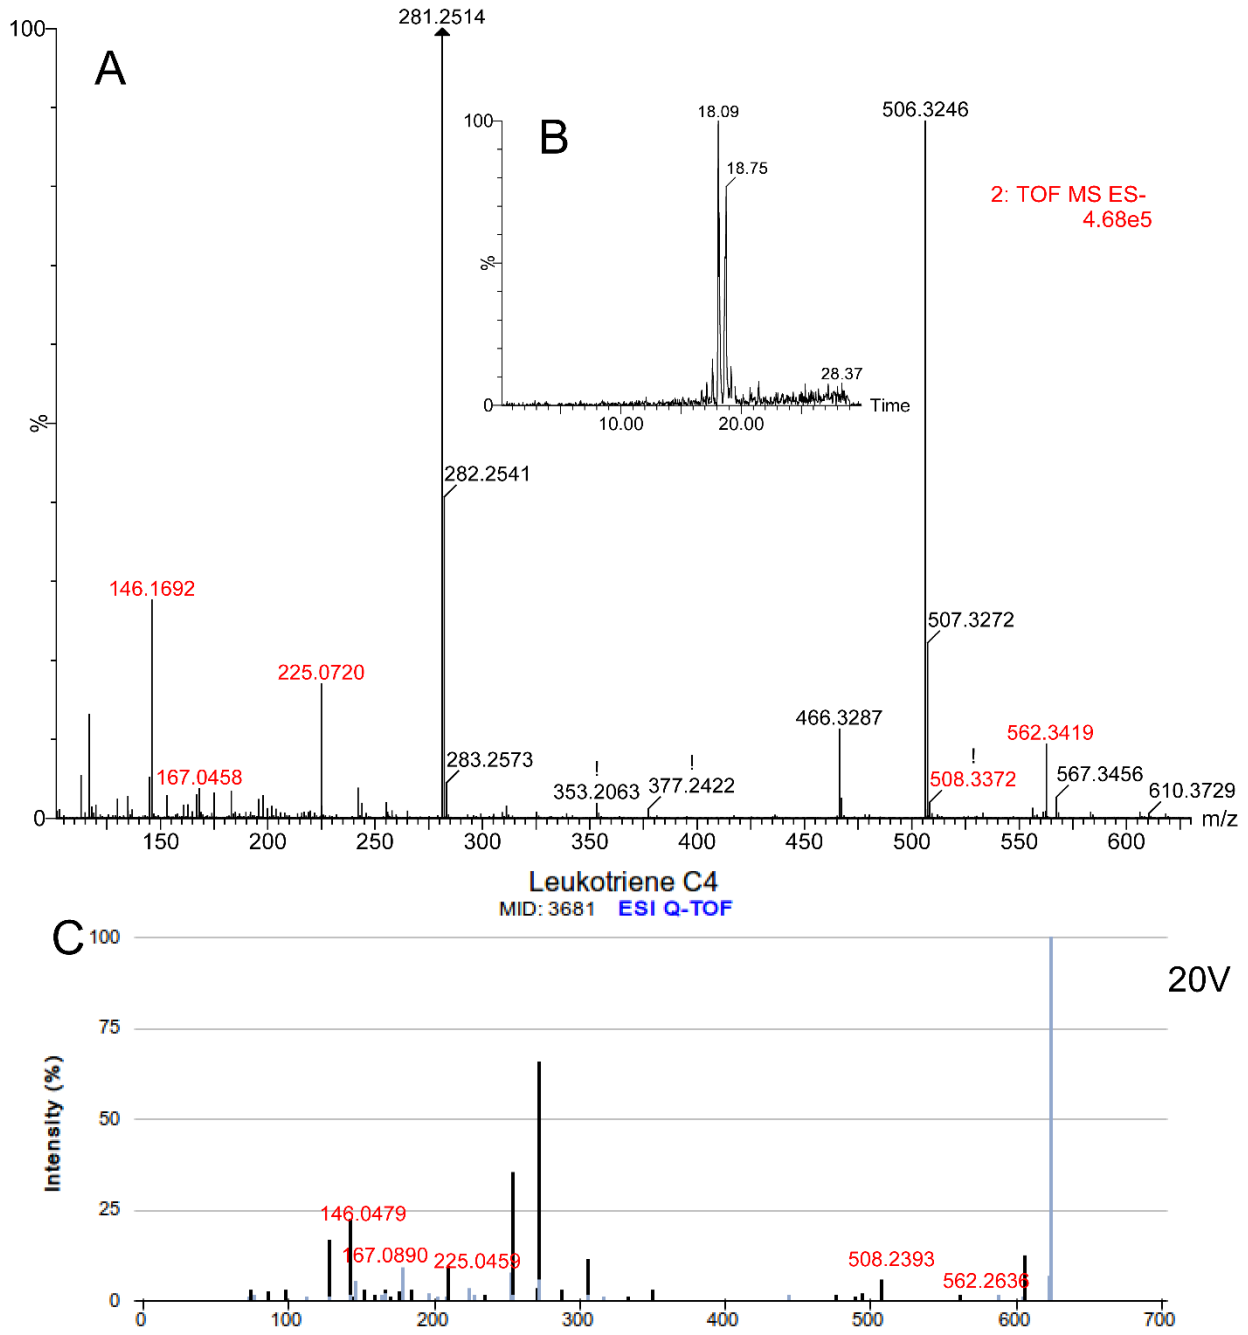

**Figure S9.** MS/MS spectra of the identified potential metabolic marker S9 Leukotriene C4 (A) and the chromatographic peak of Leukotriene C4 (B). The reference spectra from METLIN database with in voltage 20V (C).



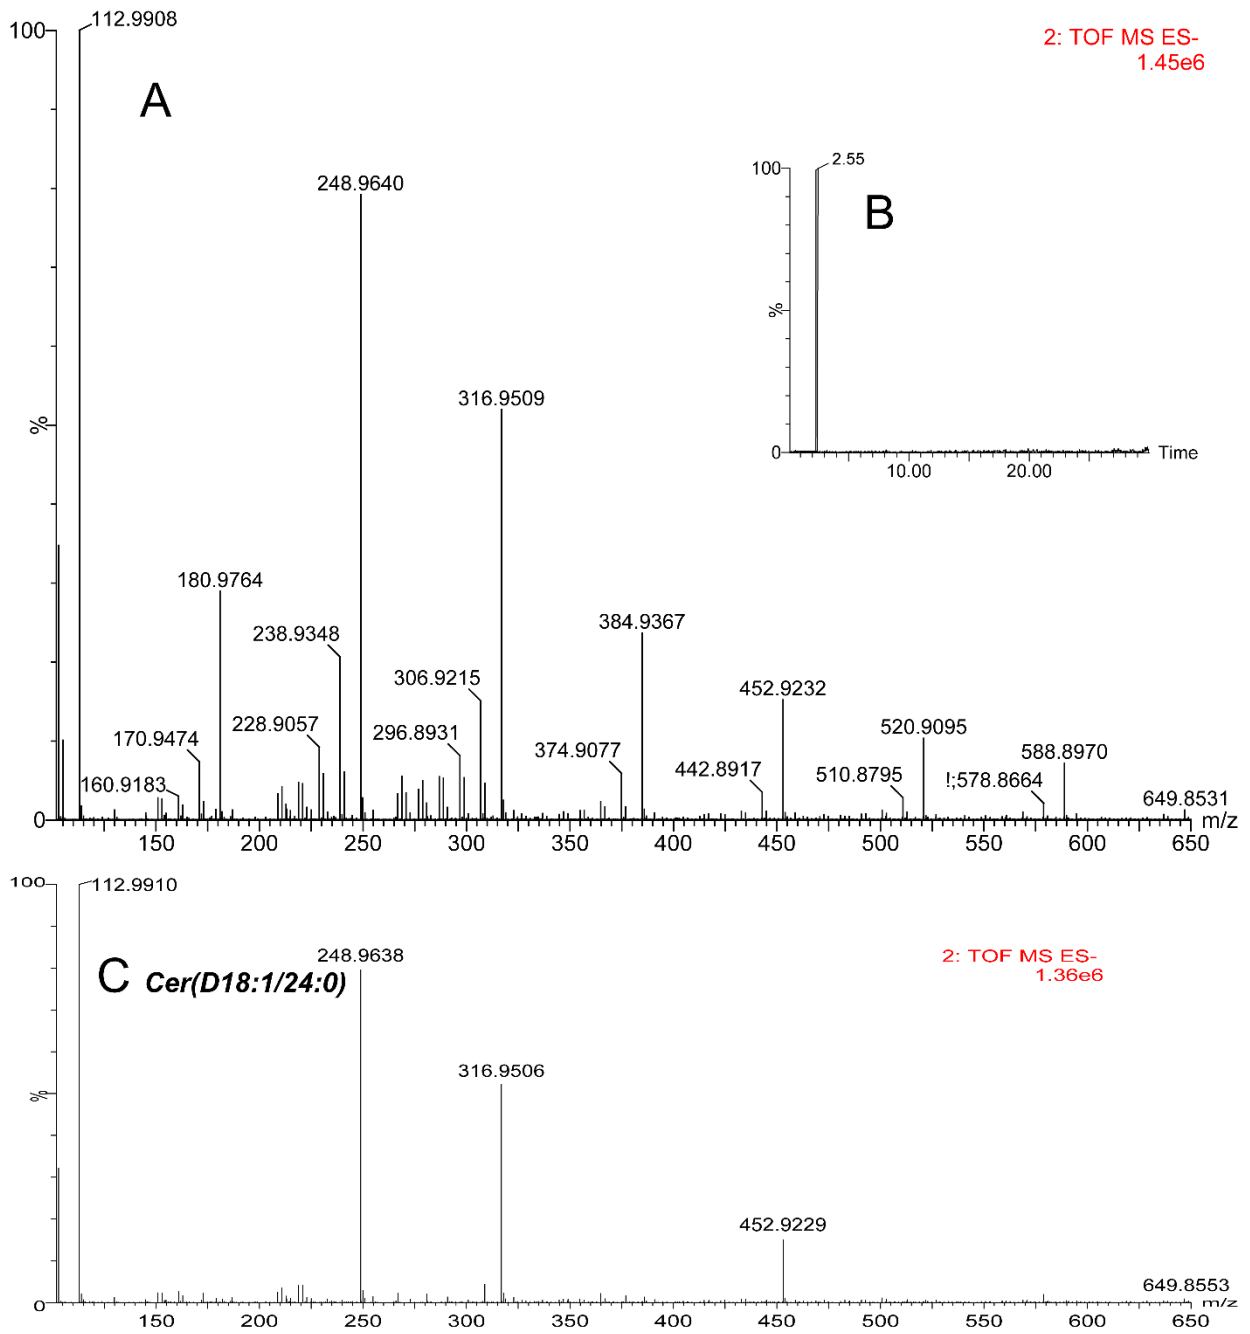

**Figure S10.** MS/MS spectra of the identified potential metabolic marker **S10** Ceramide (d18:1/24:0) (A) and the chromatographic peak of Ceramide (d18:1/24:0) (B). The reference standard chemical spectra of Ceramide (d18:1/24:0) (C).

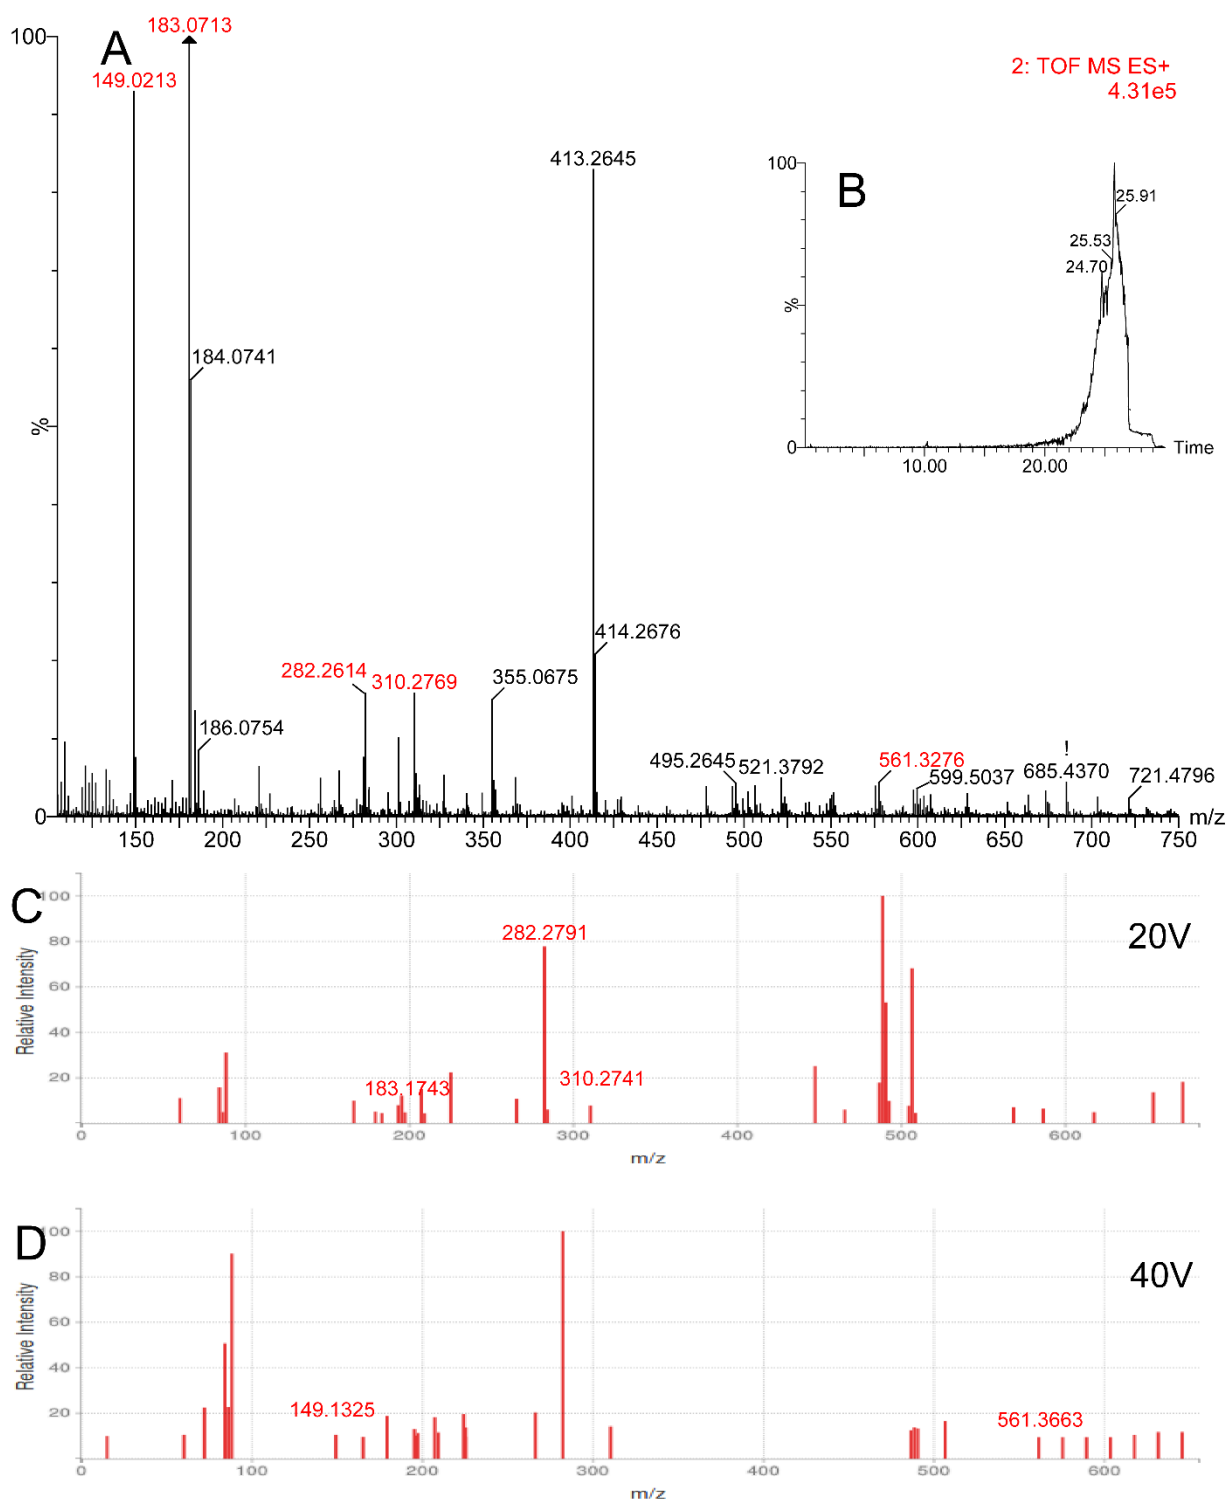

**Figure S11.** MS/MS spectra of the identified potential metabolic marker **S11** Sm(d18:0/18:1) (A) and the chromatographic peak of Sm(d18:0/18:1) (B). The reference spectra from HMDB database with in voltage 20V (C) and voltage of 40V (D).

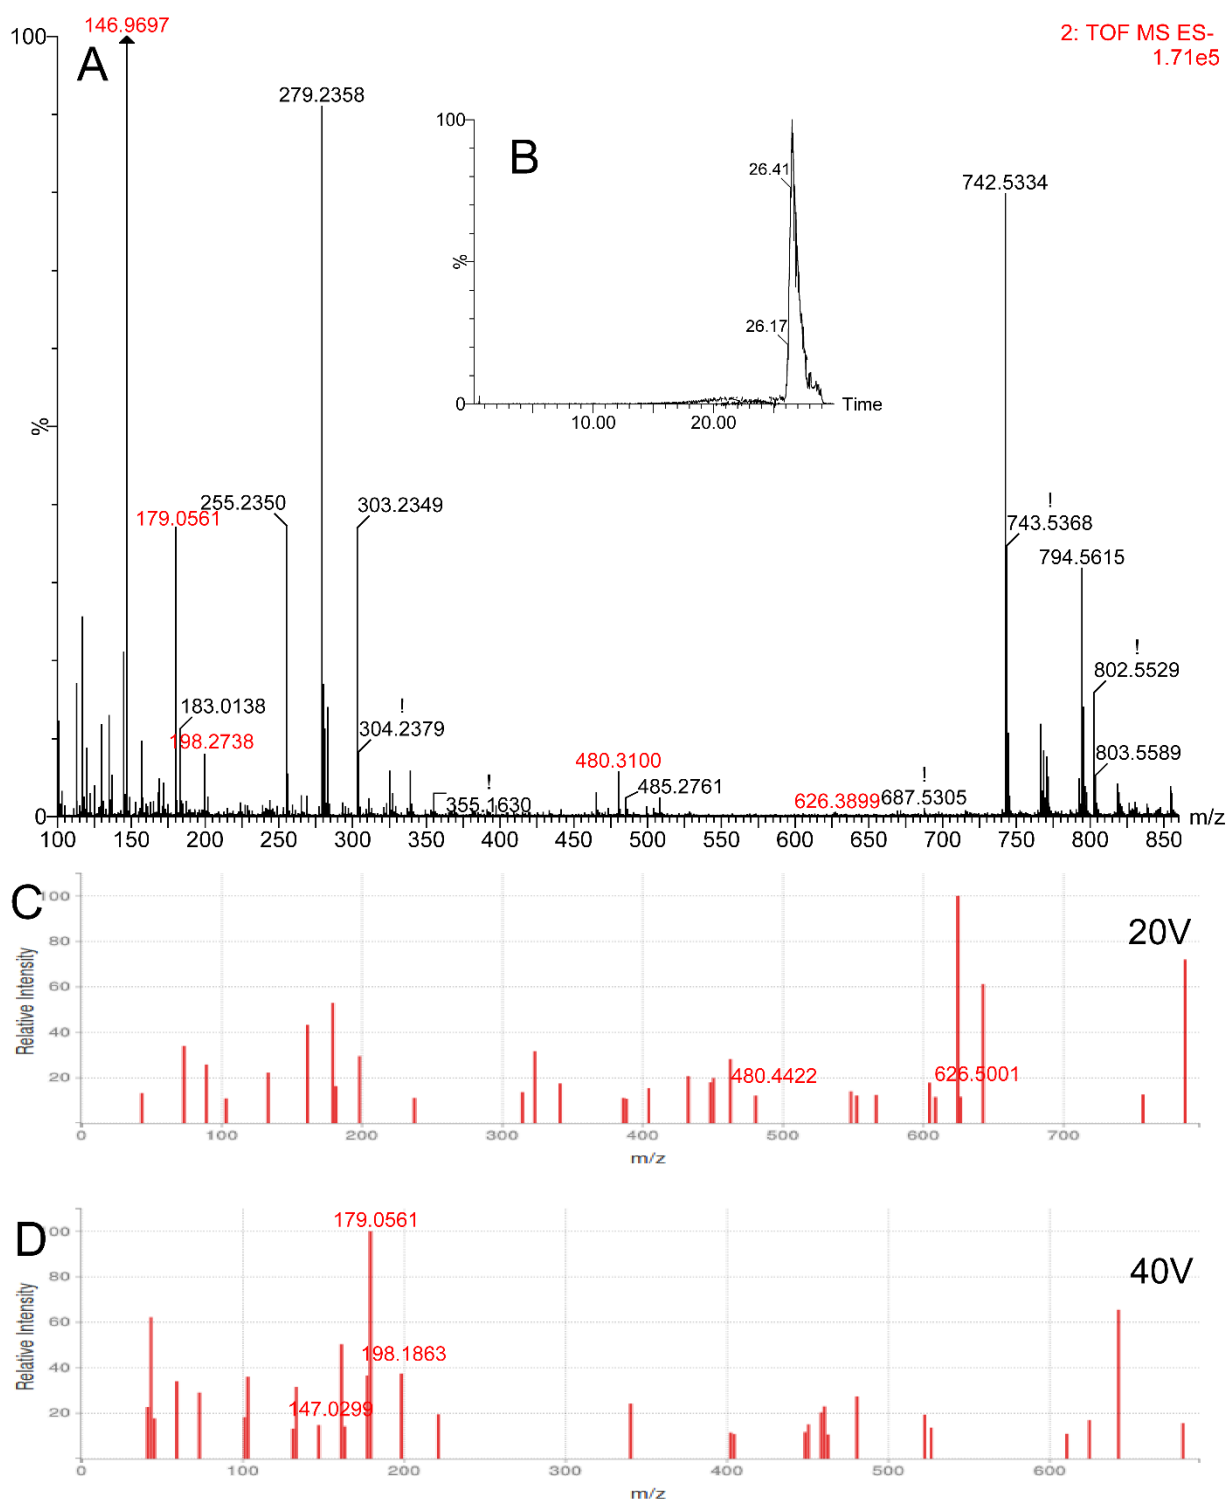

**Figure S12.** MS/MS spectra of the identified potential metabolic marker **S12** Lactosylceramide (d18:1/12:0) (A) and the chromatographic peak of Lactosylceramide (d18:1/12:0) (B). The reference spectra from HMDB database with in voltage 20V (C) and voltage of 40V (D).

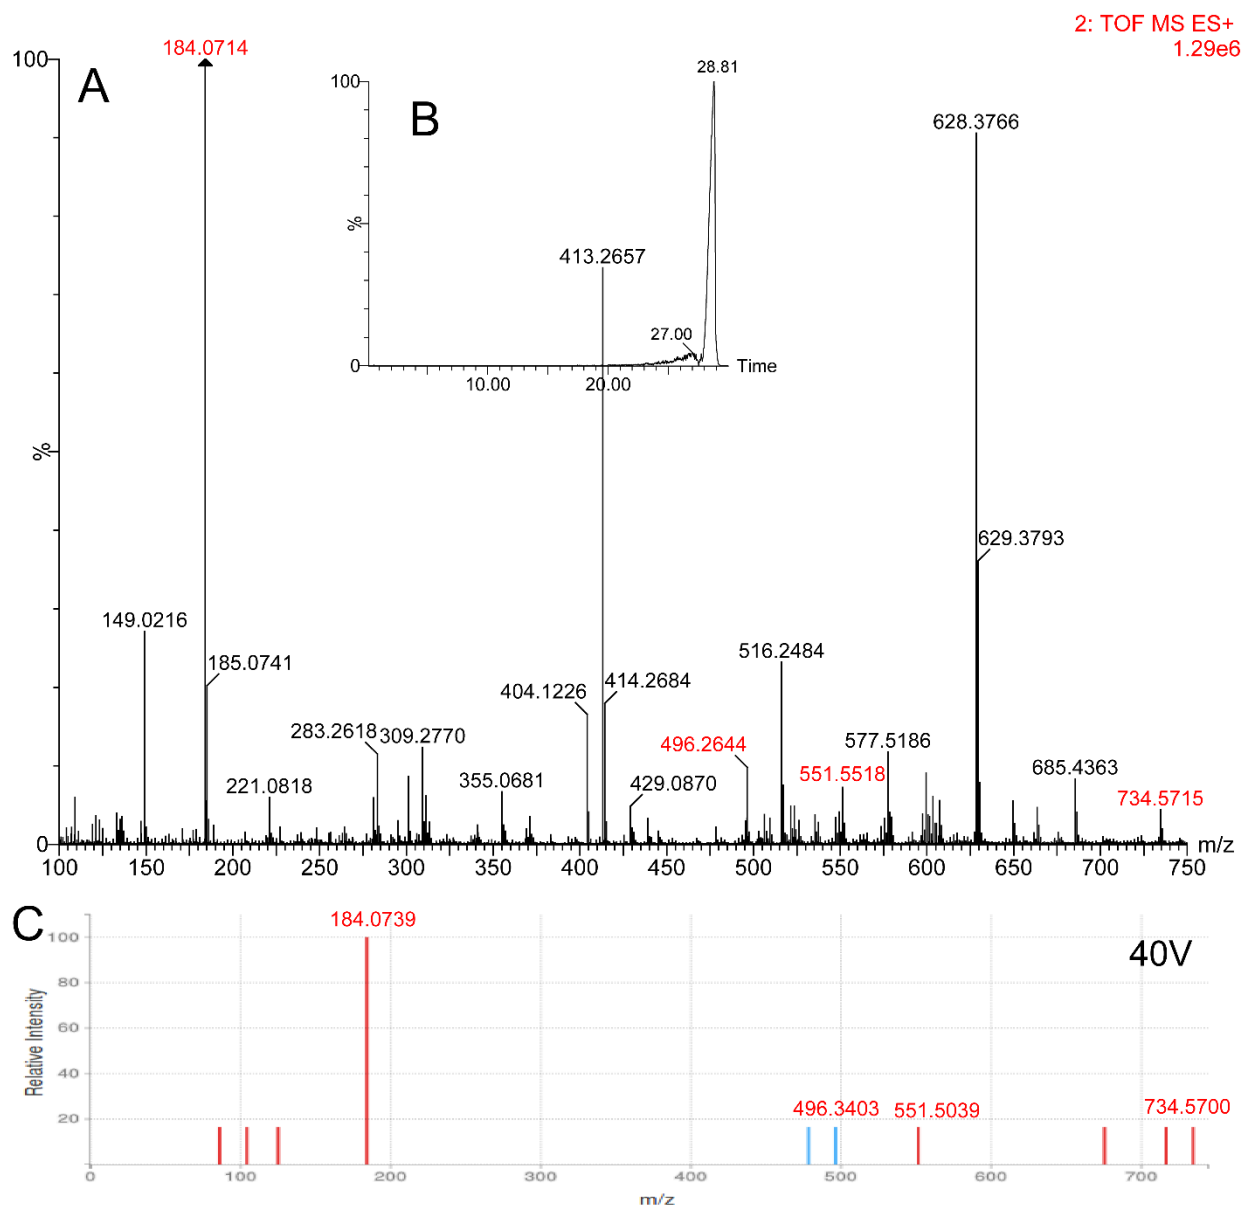

**Figure S13.** MS/MS spectra of the identified potential metabolic marker **S13** Pc(16:0/16:0) (A) and the chromatographic peak of Pc(16:0/16:0) (B). The reference spectra from HMDB database with in voltage 40V (C).

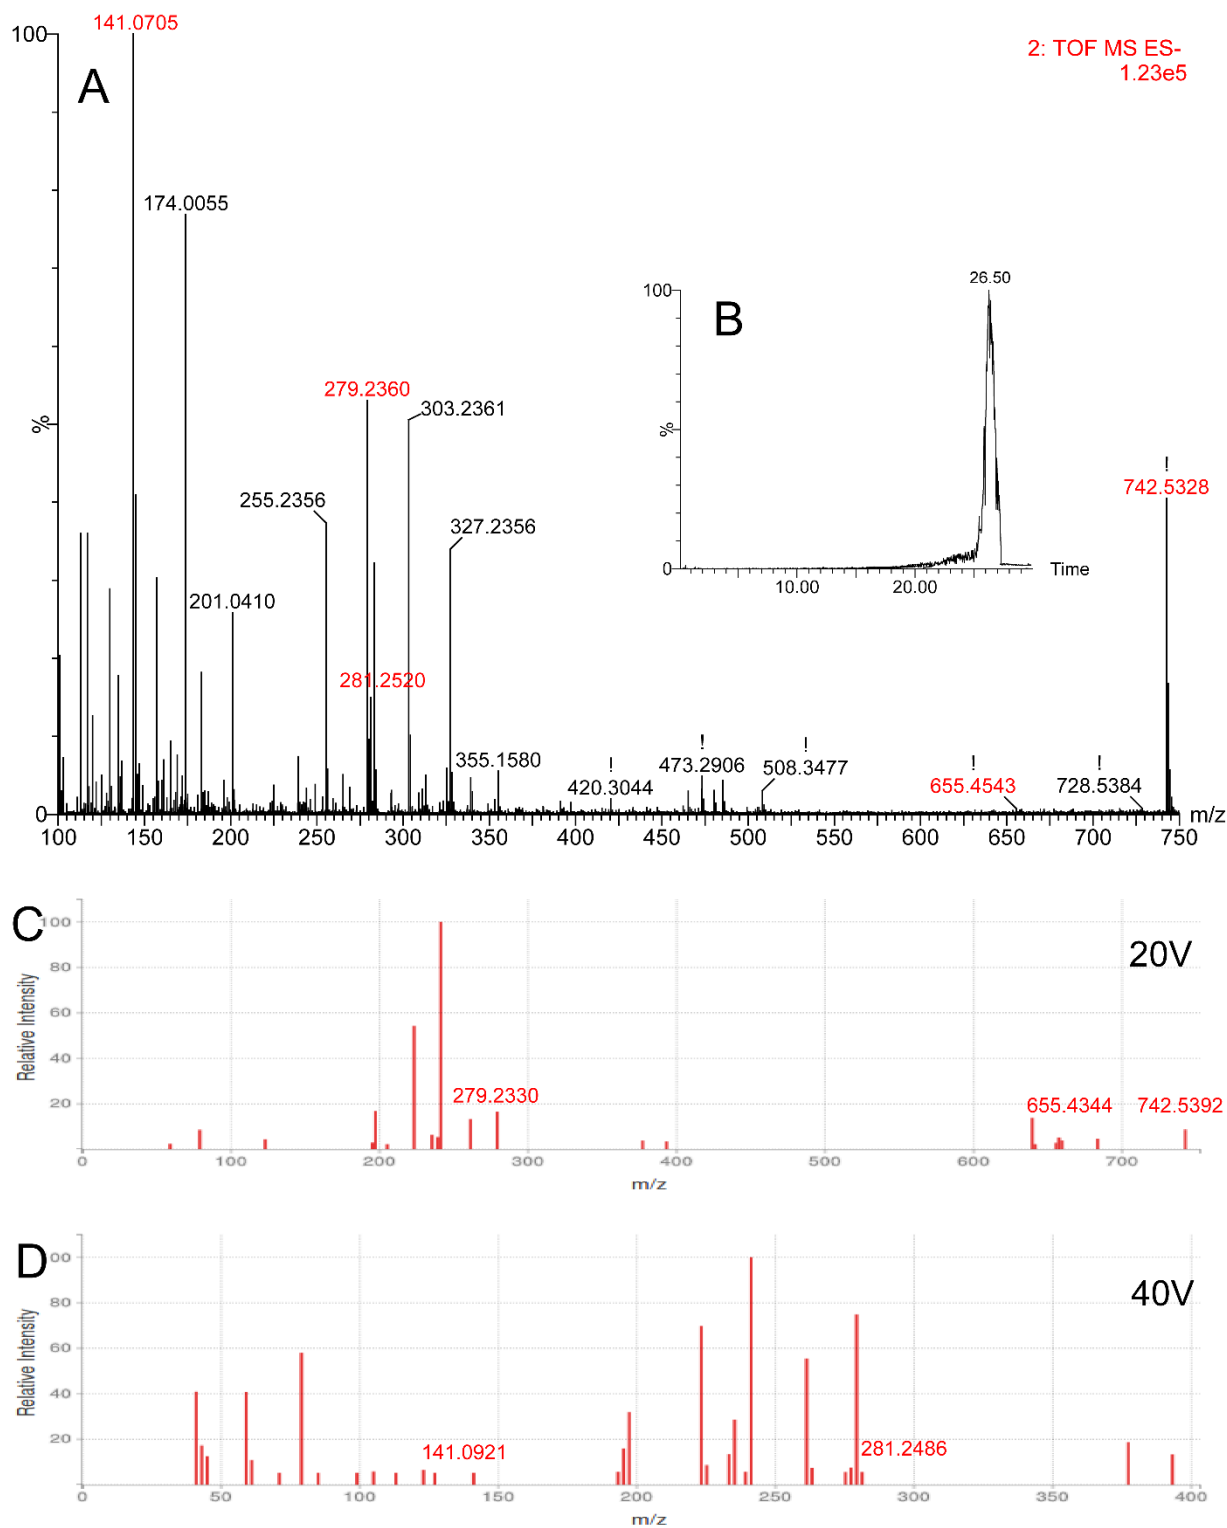

**Figure S14.** MS/MS spectra of the identified potential metabolic marker S14 Pc(15:0/18:2) (A) and the chromatographic peak of Pc(15:0/18:2) (B). The reference spectra from HMDB database with in voltage 20V (C) and voltage of 40V (D).

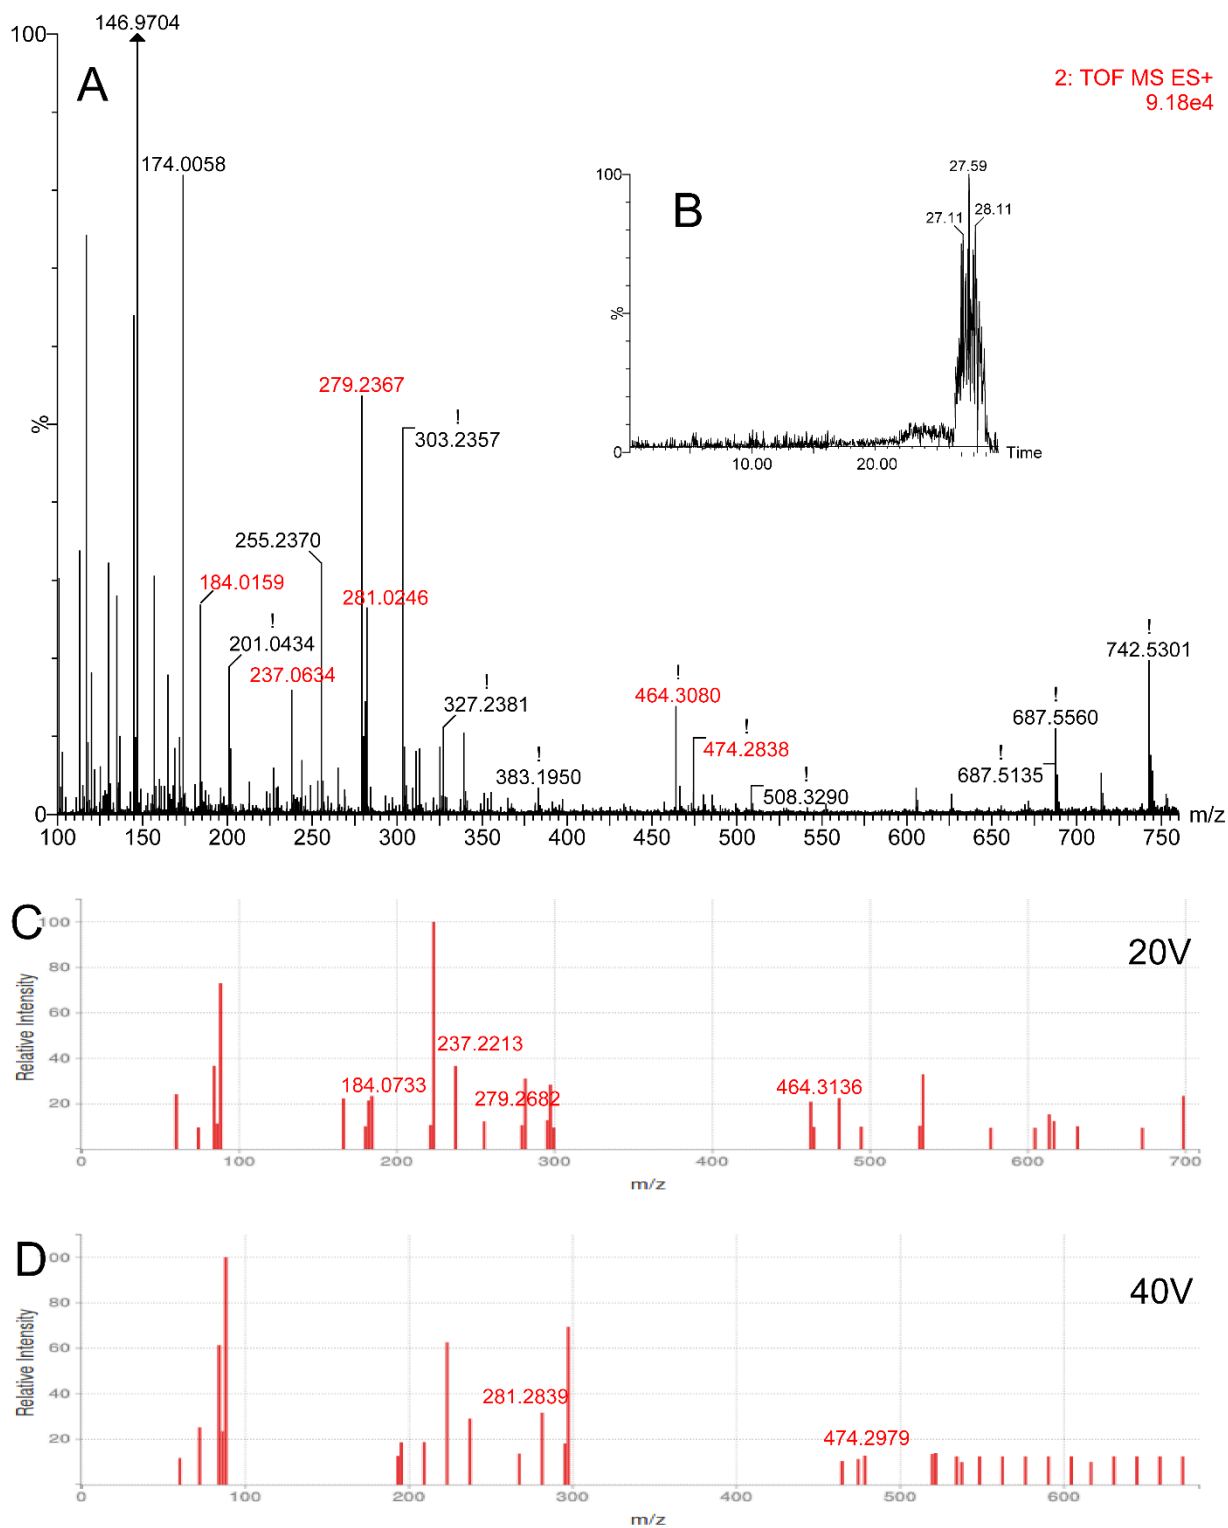

**Figure S15.** MS/MS spectra of the identified potential metabolic marker S15 Pc(16:1/16:1) (A) and the chromatographic peak of Pc(16:1/16:1) (B). The reference spectra from HMDB database with in voltage 20V (C) and voltage of 40V (D).

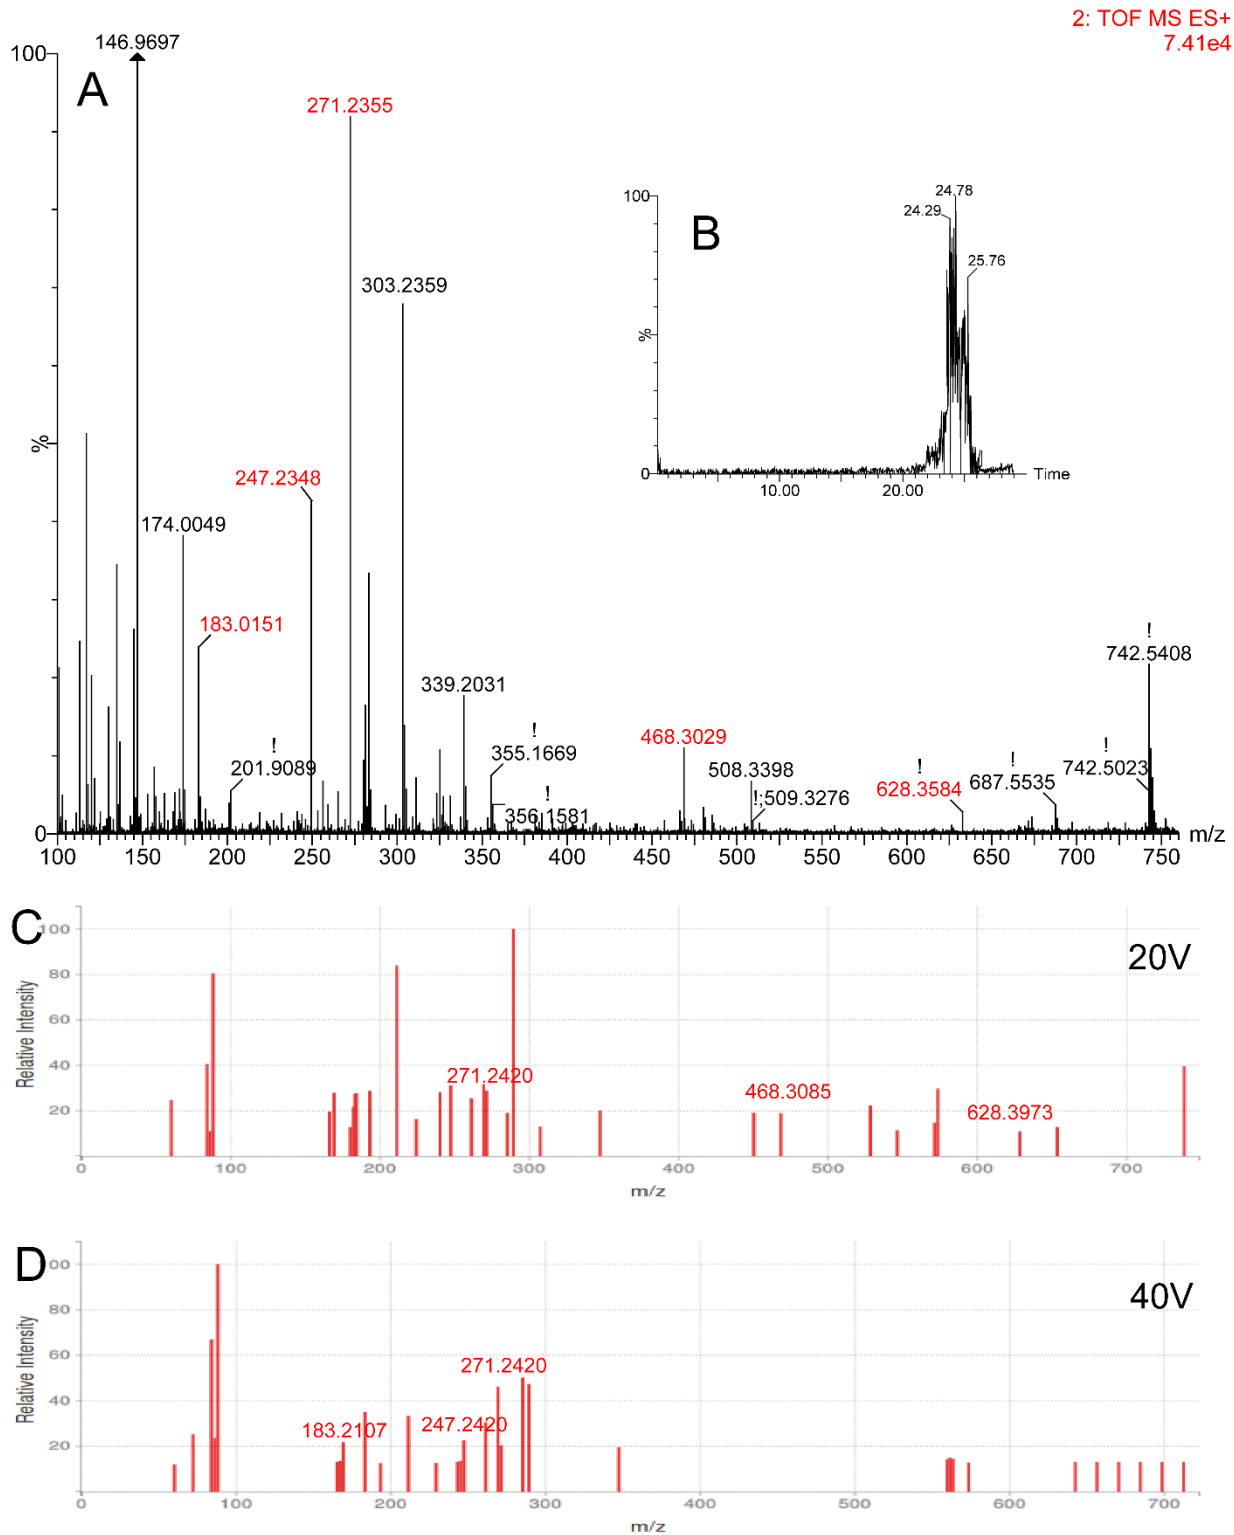

**Figure S16.** MS/MS spectra of the identified potential metabolic marker **S16** Pc(14:0/20:3) (A) and the chromatographic peak of Pc(14:0/20:3) (B). The reference spectra from HMDB database with in voltage 20V (C) and voltage of 40V (D).

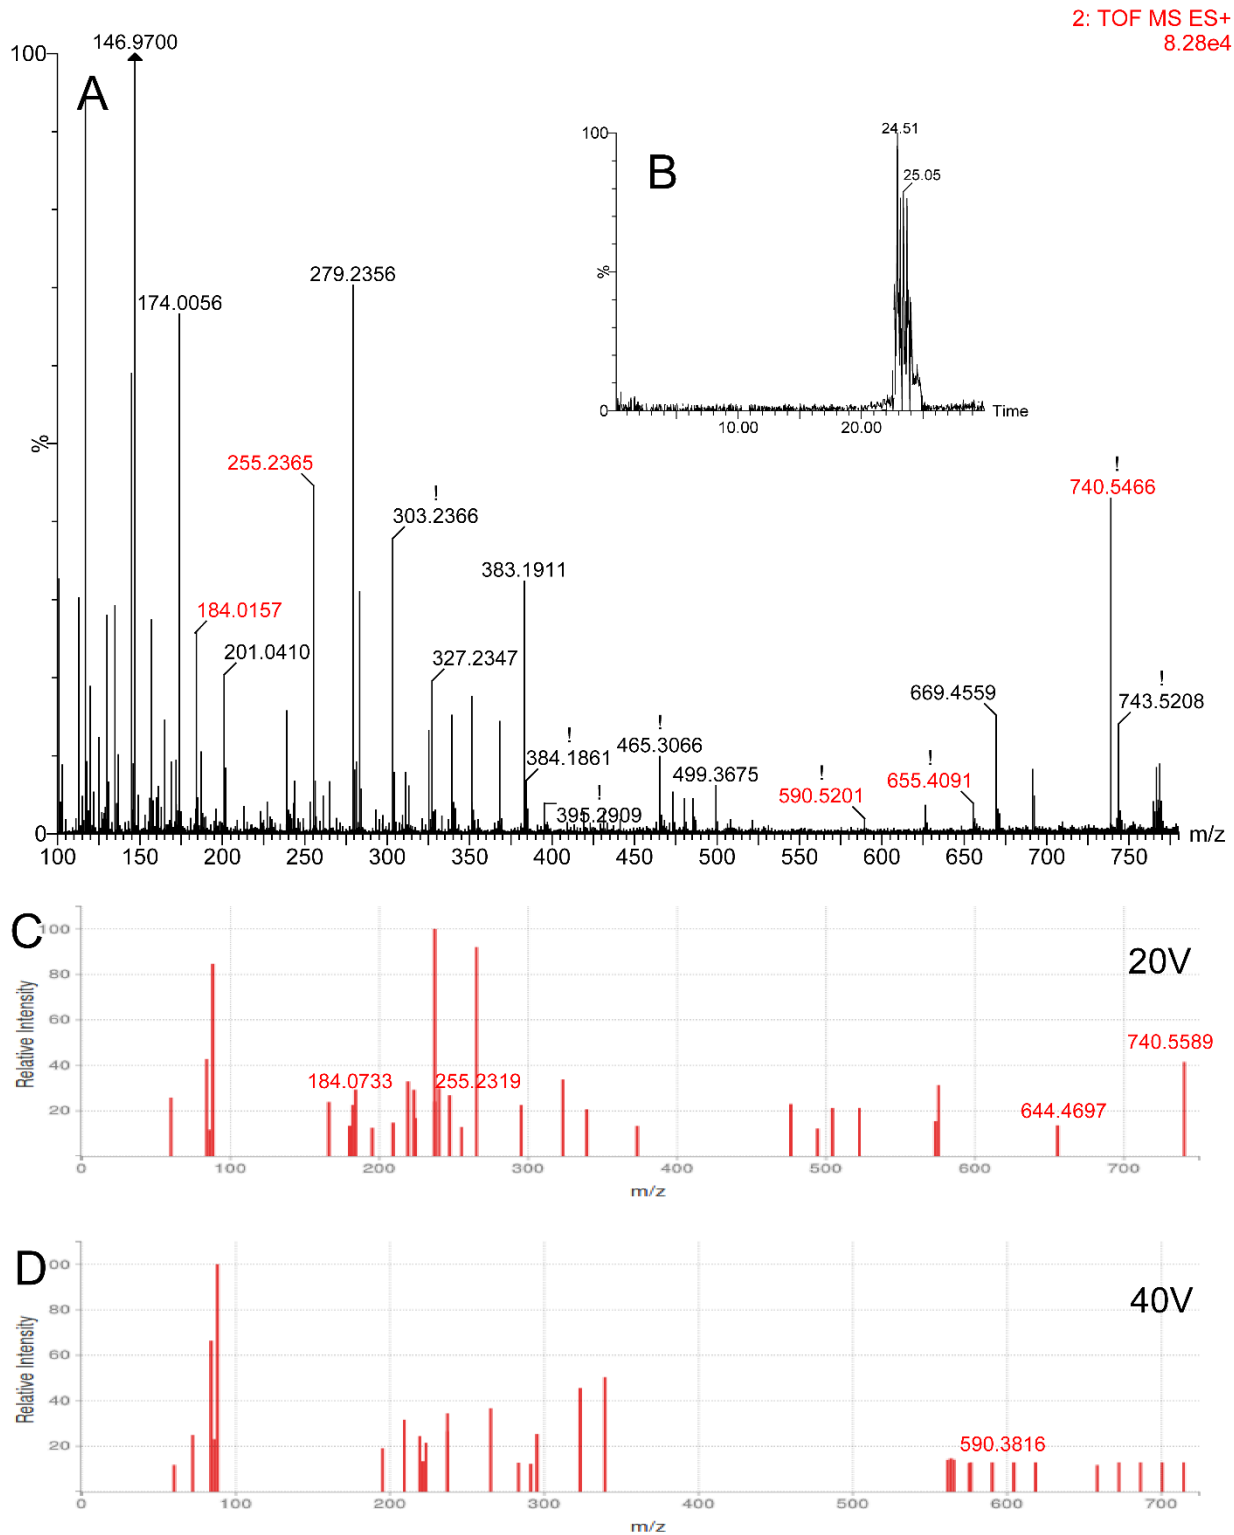

**Figure S17.** MS/MS spectra of the identified potential metabolic marker S17 Pc(18:1/16:1) (A) and the chromatographic peak of Pc(18:1/16:1) (B). The reference spectra from HMDB database with in voltage 20V (C) and voltage of 40V (D).



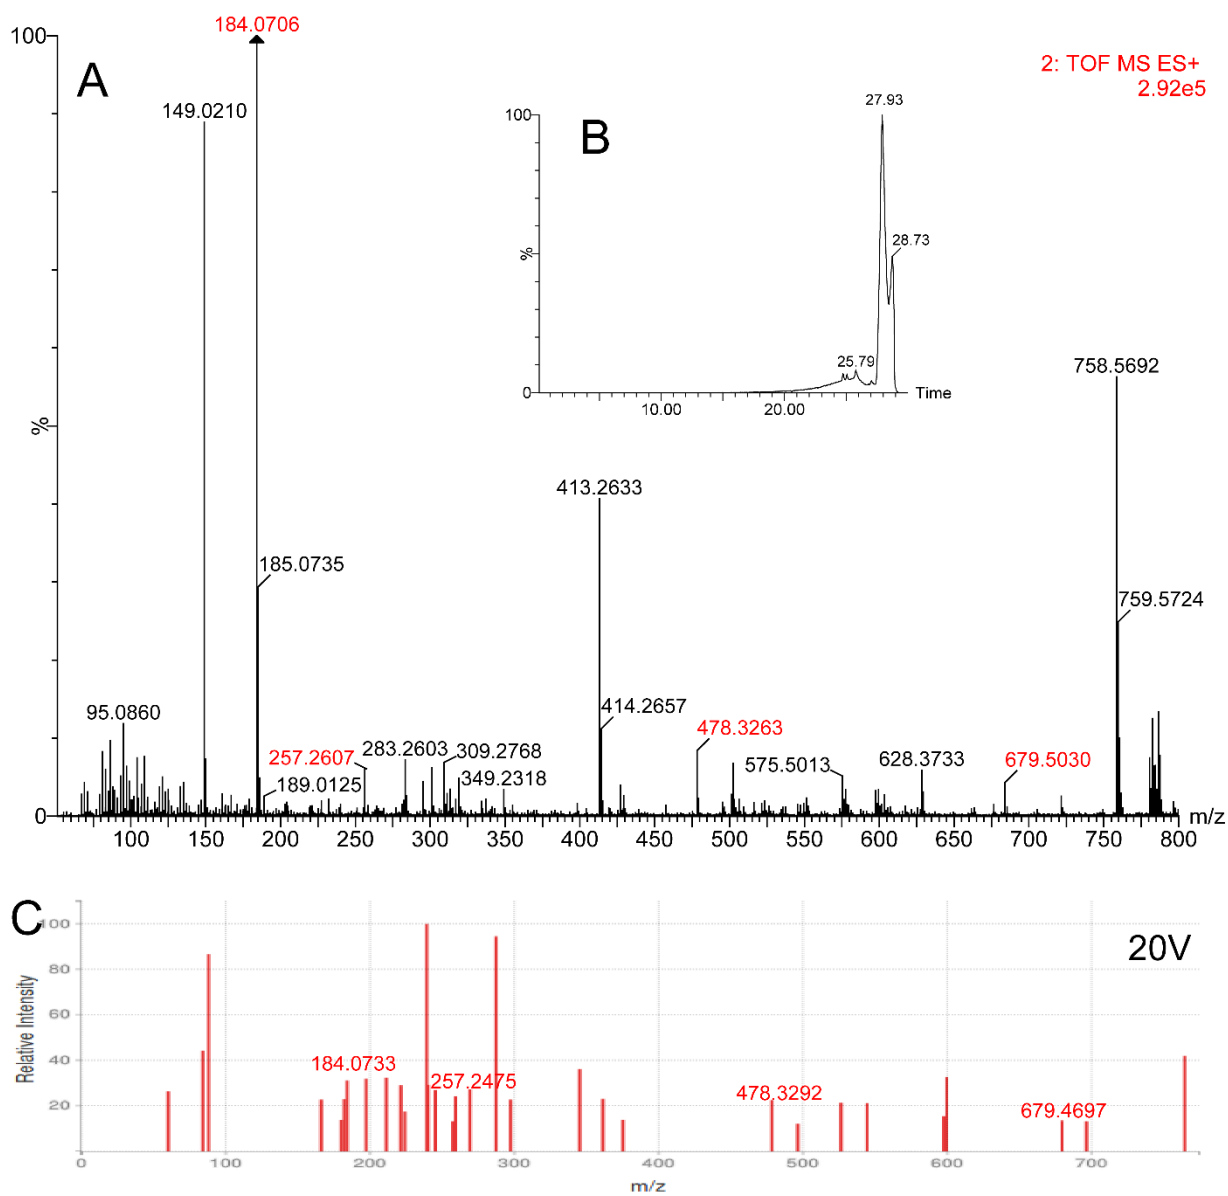

**Figure S18.** MS/MS spectra of the identified potential metabolic marker **S18** Pc(20:4/16:0) (A) and the chromatographic peak of Pc(20:4/16:0) (B). The reference spectra from HMDB database with in voltage 20V (C).

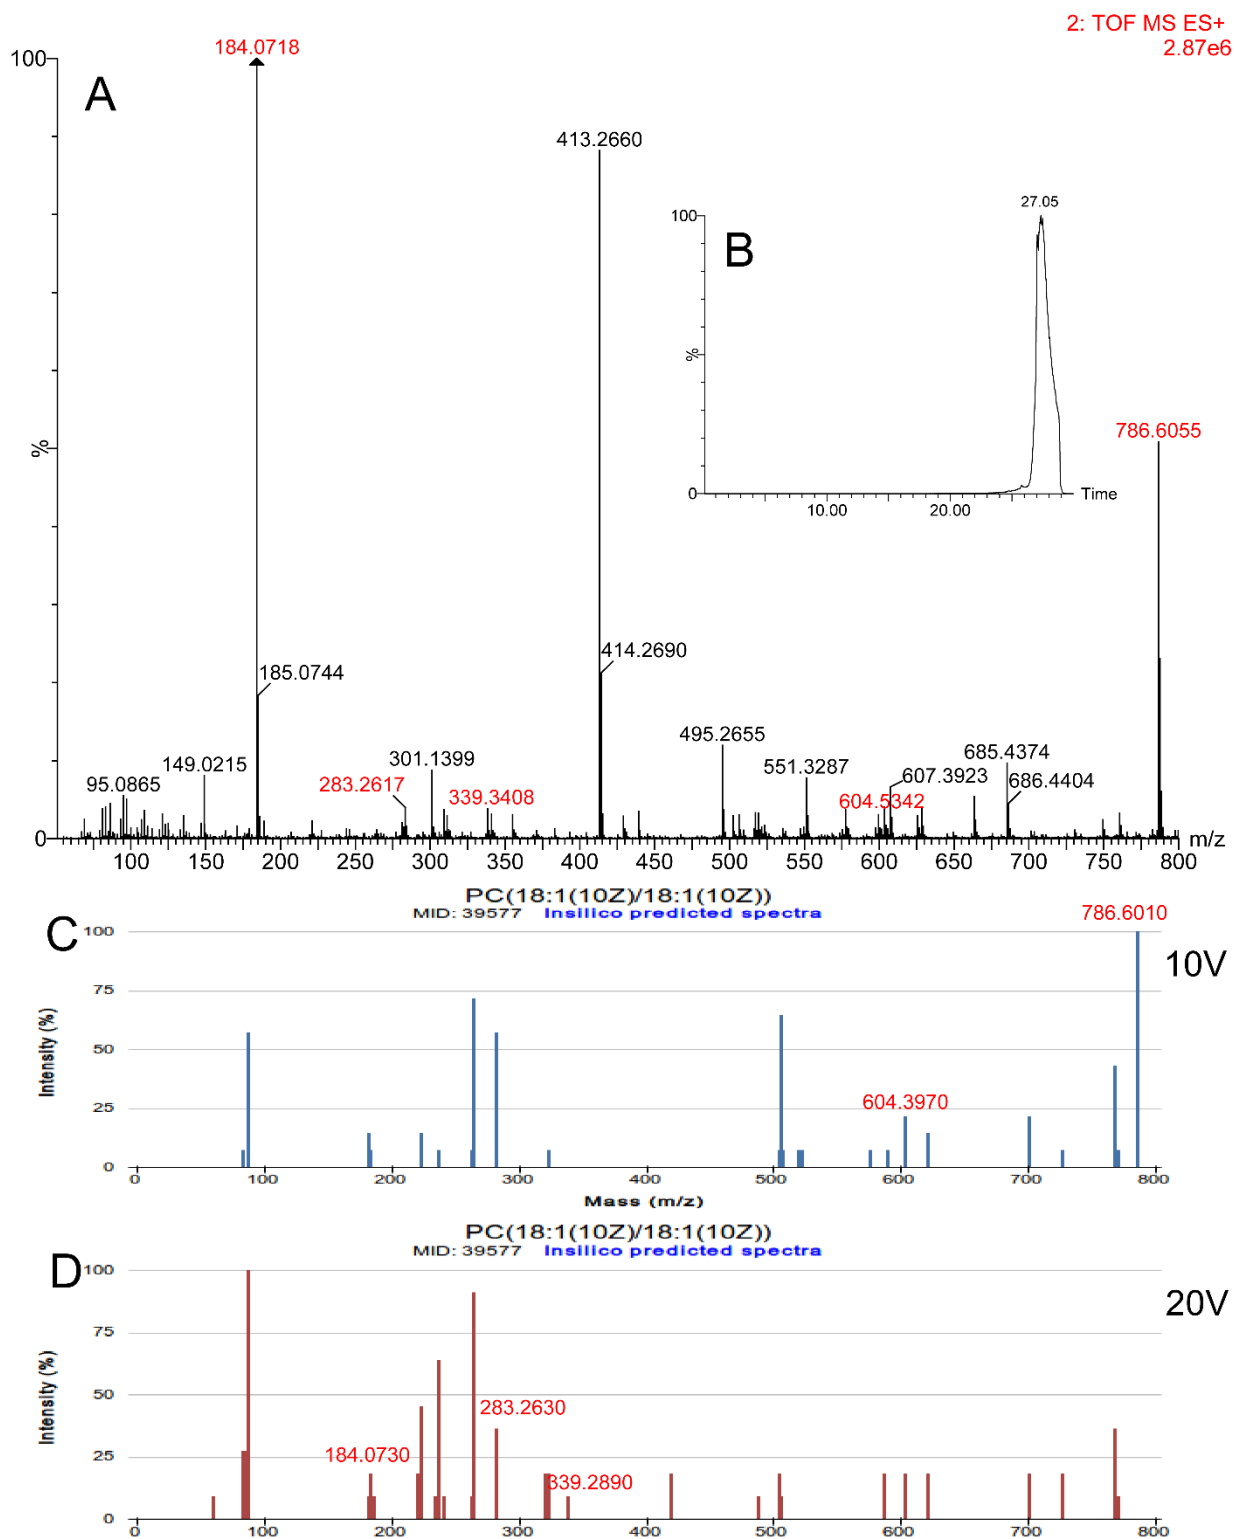

**Figure S19.** MS/MS spectra of the identified potential metabolic marker **S19** Pc(18:1/18:1) (A) and the chromatographic peak of Pc(18:1/18:1) (B). The reference spectra from METLIN database with in voltage 10V (C) and voltage of 20V (D).

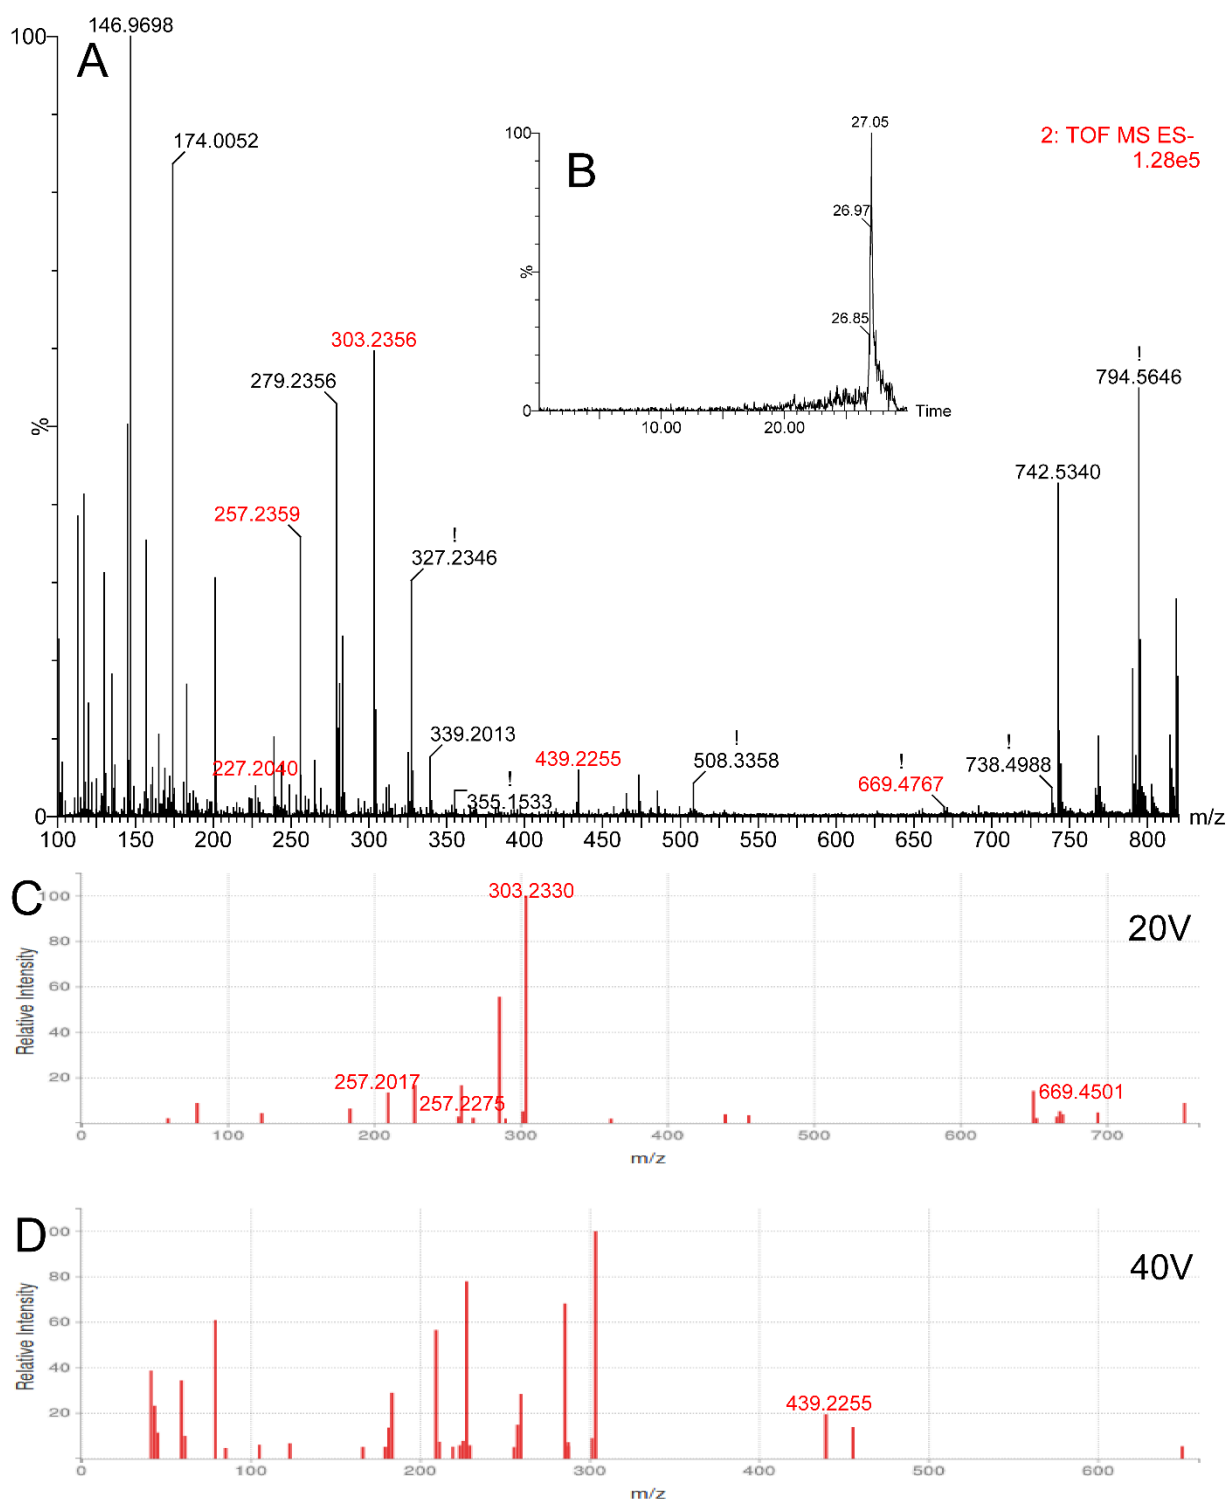

**Figure S20.** MS/MS spectra of the identified potential metabolic marker S20 Pc(20:4/14:0) (A) and the chromatographic peak of Pc(20:4/14:0) (B). The reference spectra from HMDB database with in voltage 20V (C) and voltage of 40V (D).

2: TOF MS ES-  
1.00e5

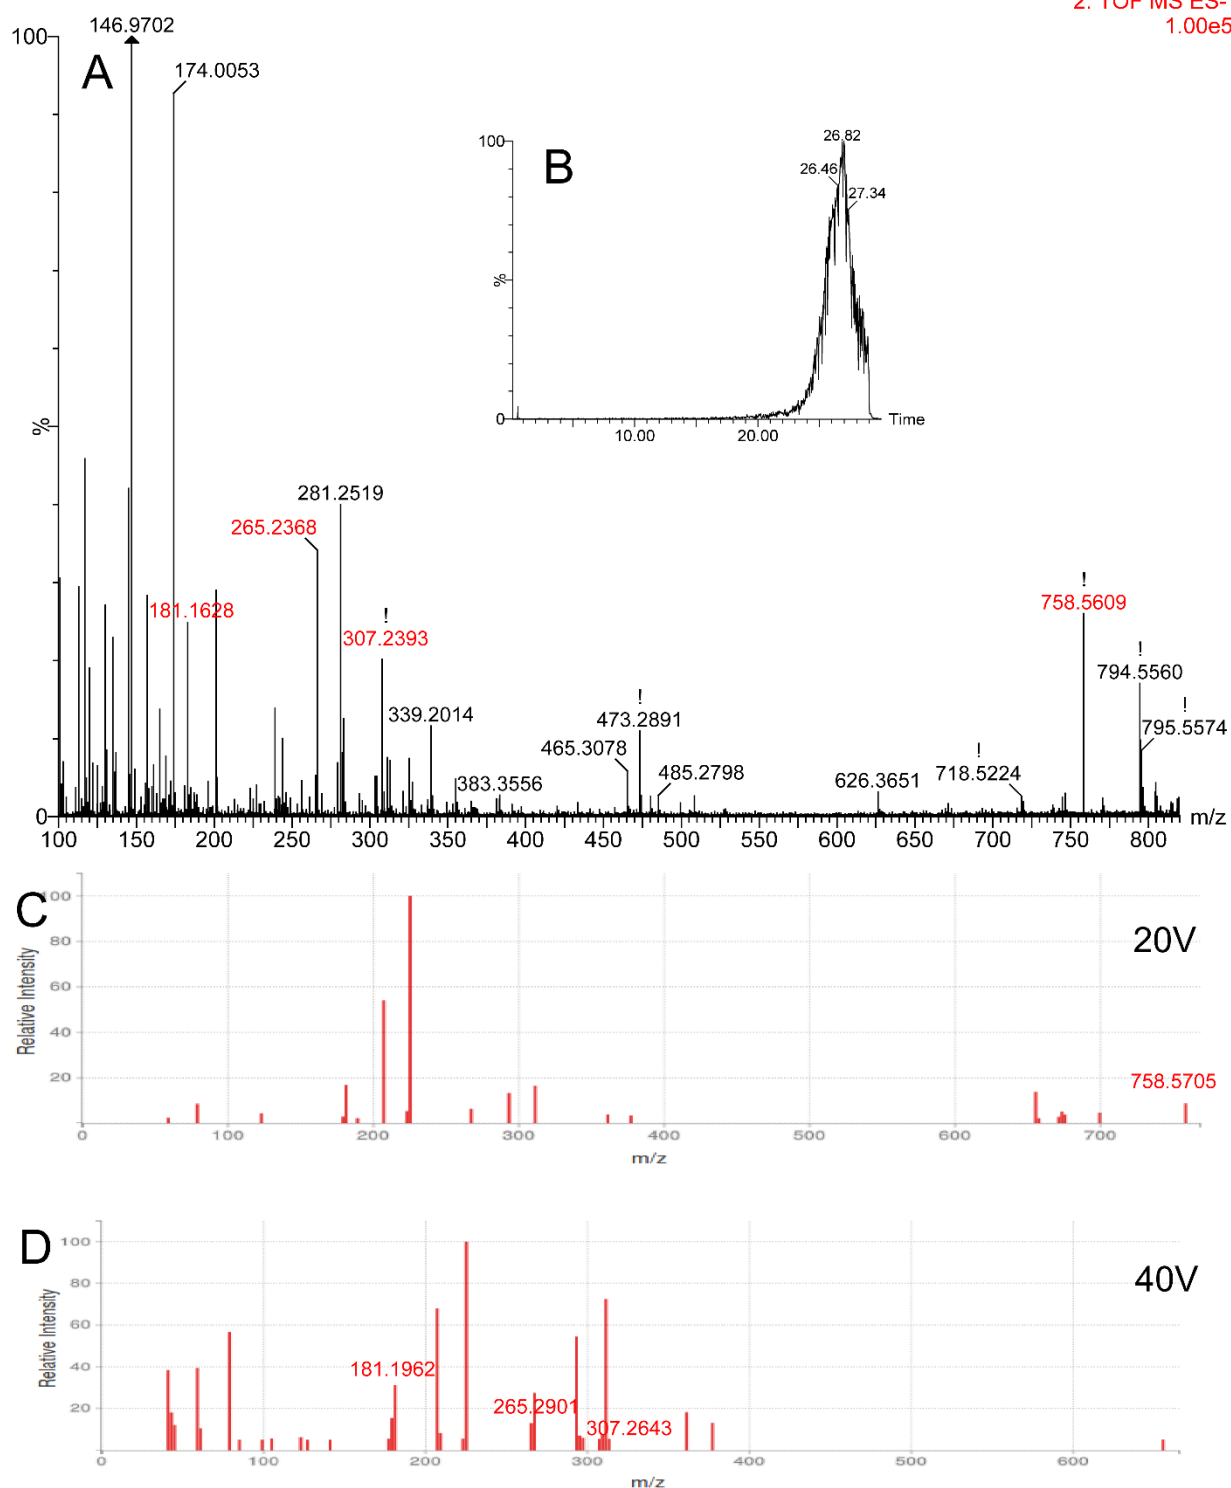

**Figure S21.** MS/MS spectra of the identified potential metabolic marker S21 Pc(14:1/20:0) (A) and the chromatographic peak of Pc(14:1/20:0) (B). The reference spectra from HMDB database with in voltage 20V (C) and voltage of 40V (D).

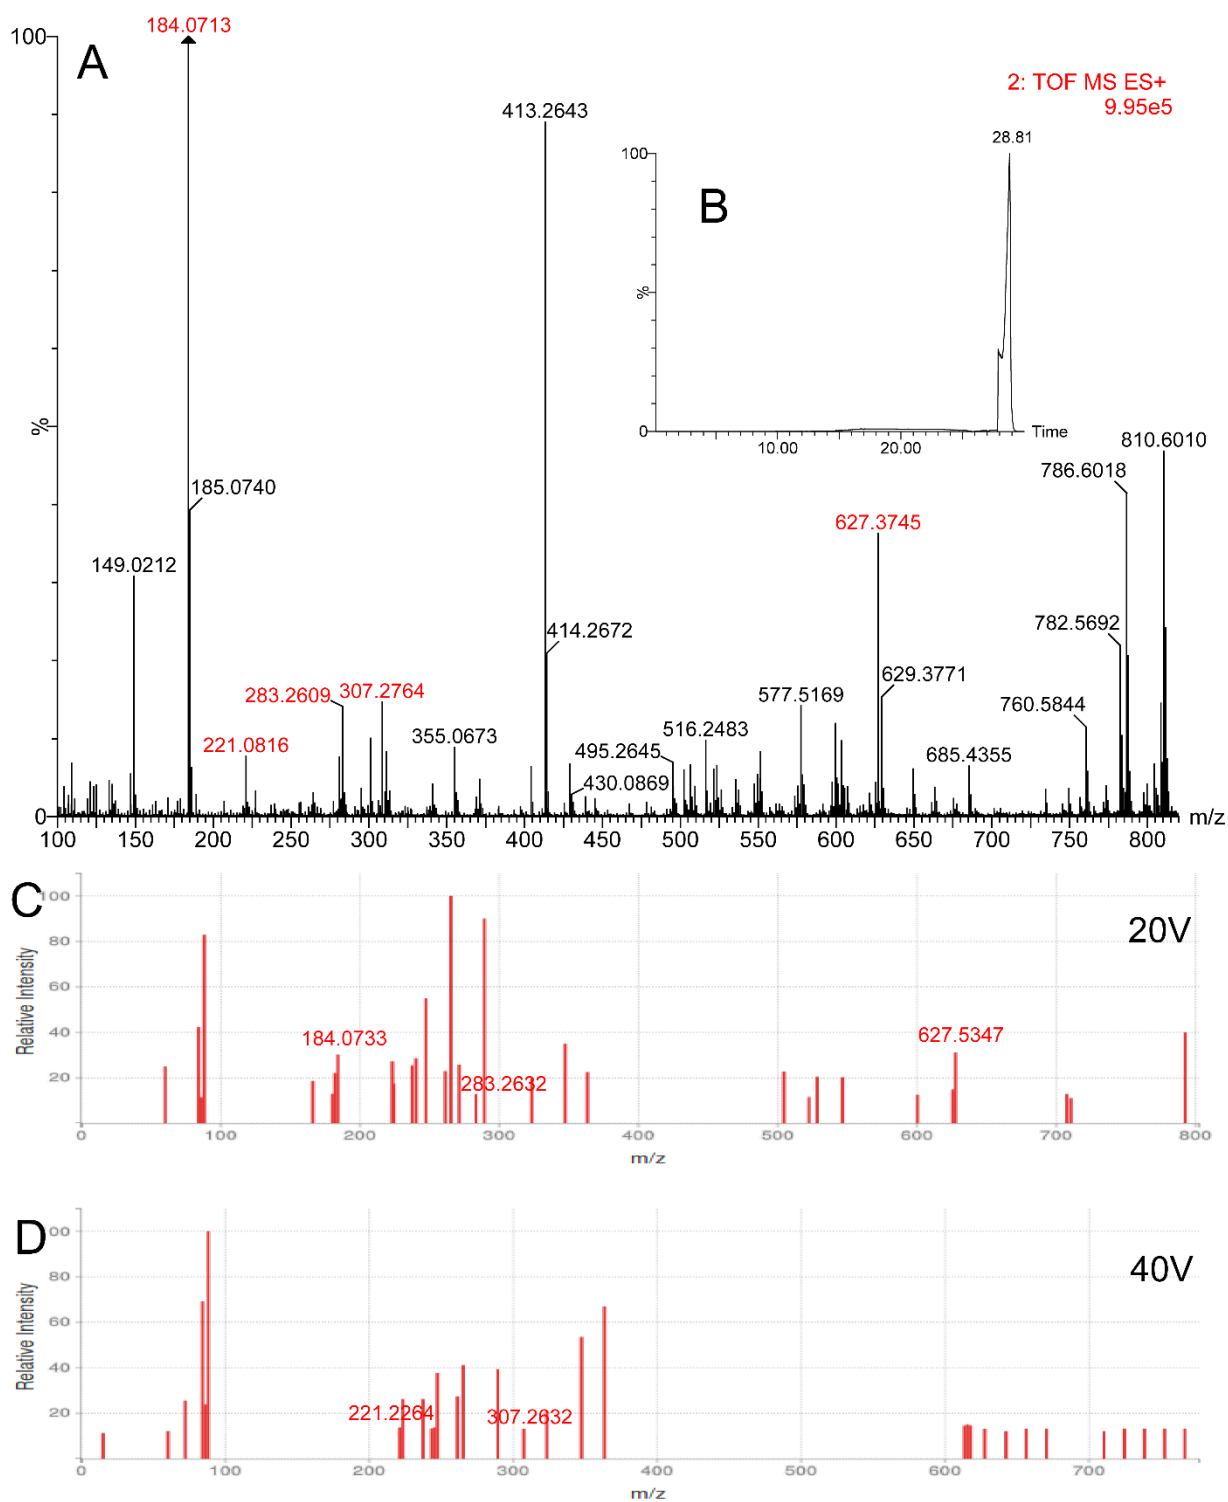

**Figure S22.** MS/MS spectra of the identified potential metabolic marker **S22** Pc(20:3/18:1) (A) and the chromatographic peak of Pc(20:3/18:1) (B). The reference spectra from HMDB database with in voltage 20V (C) and voltage of 40V (D).

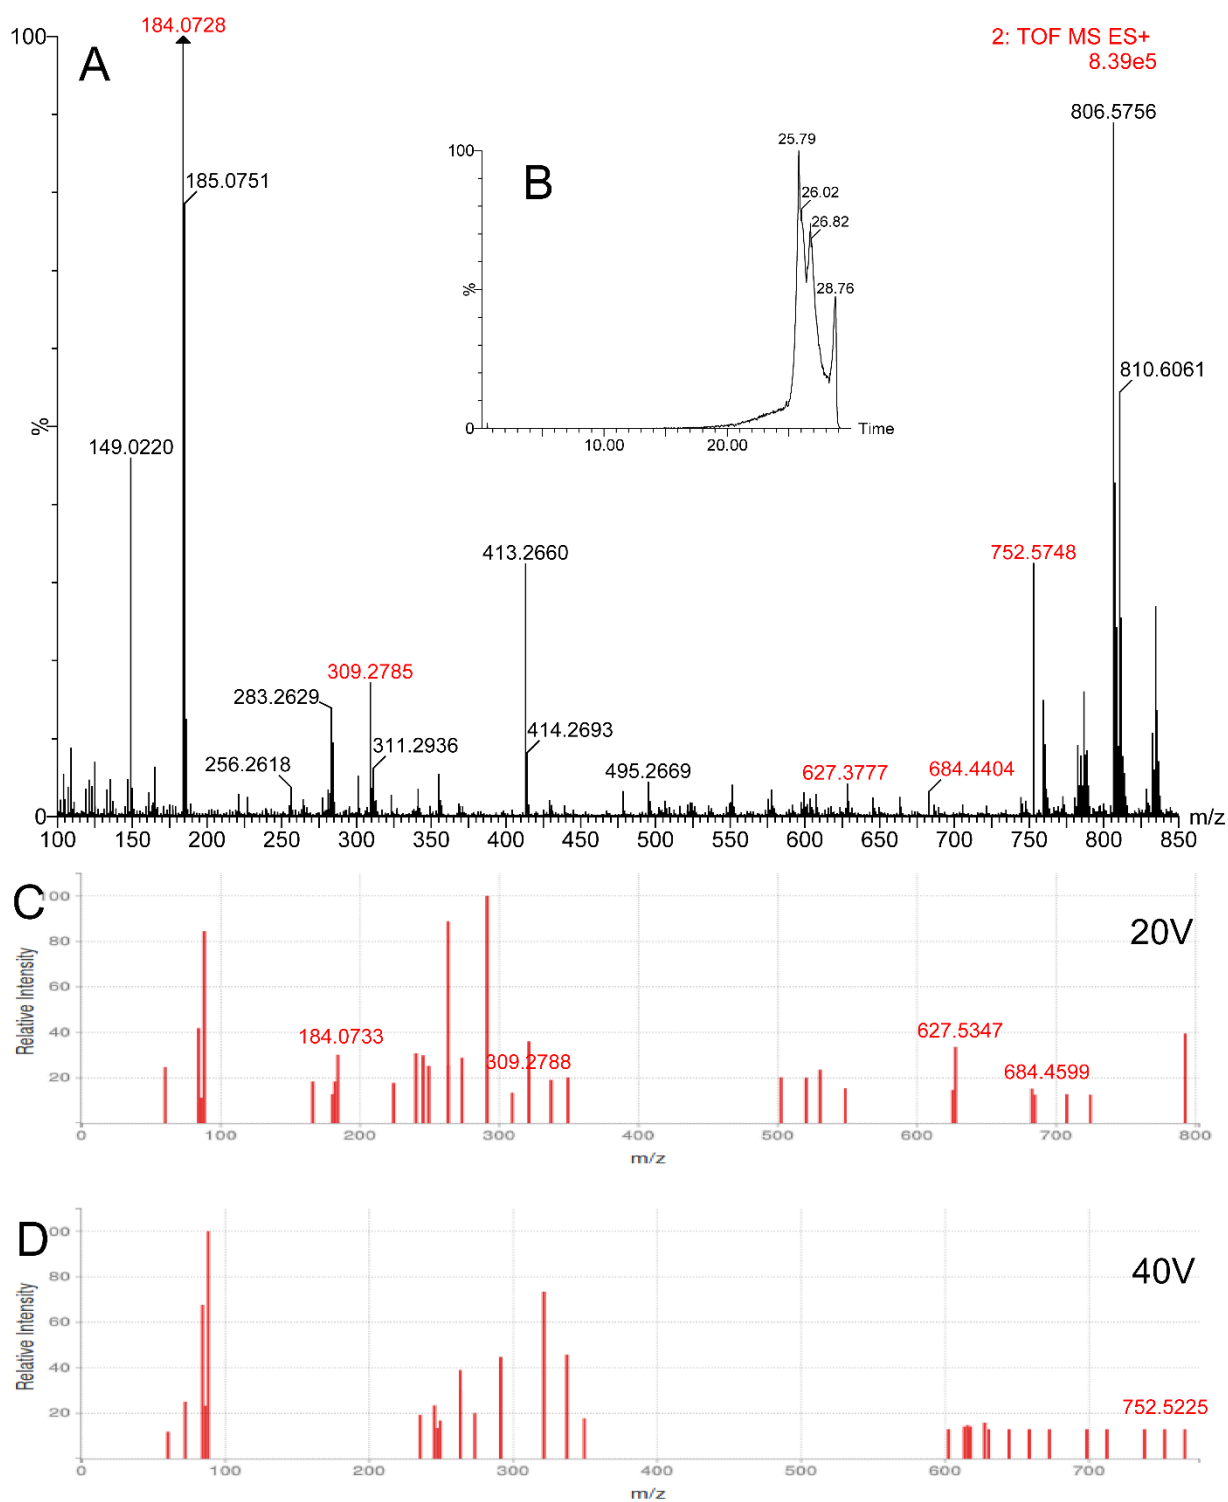

**Figure S23.** MS/MS spectra of the identified potential metabolic marker **S23** Pc(18:2/20:2) (A) and the chromatographic peak of Pc(18:2/20:2) (B). The reference spectra from HMDB database with in voltage 20V (C) and voltage of 40V (D).

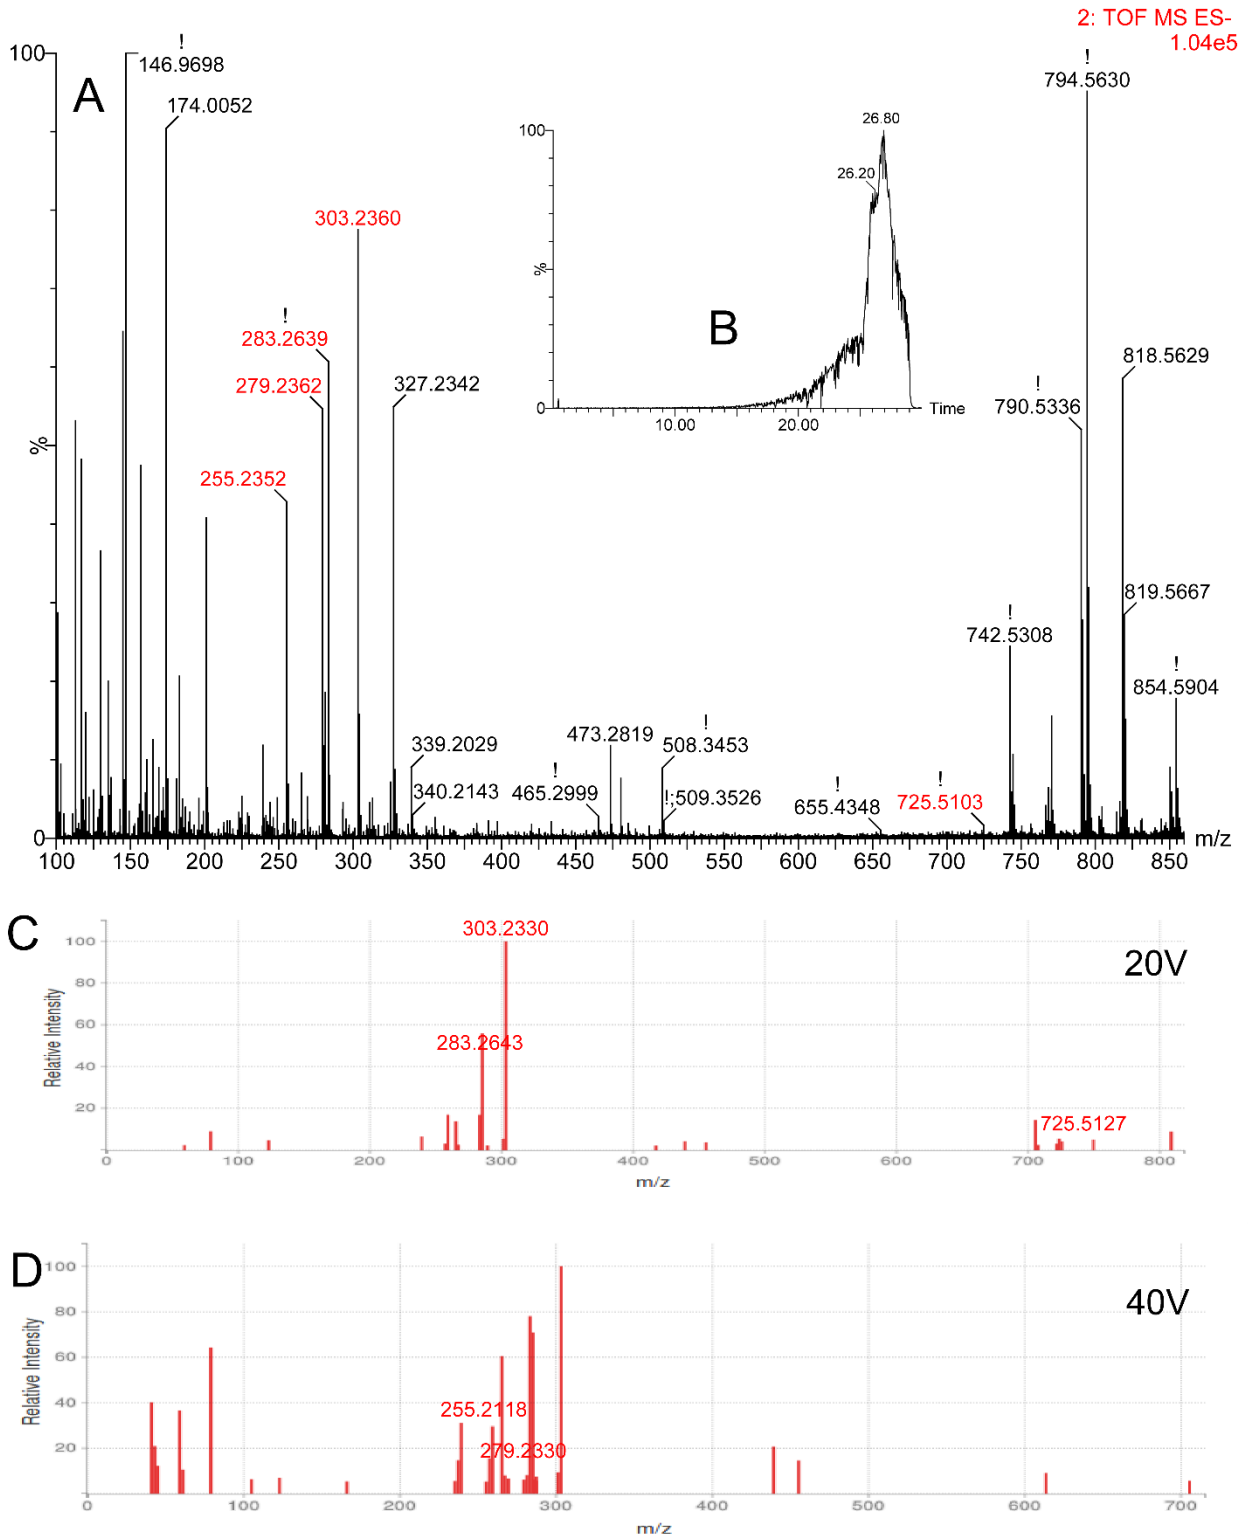

**Figure S24.** MS/MS spectra of the identified potential metabolic marker S24 Pc(20:4/18:0) (A) and the chromatographic peak of Pc(20:4/18:0) (B). The reference spectra from HMDB database with in voltage 20V (C) and voltage of 40V (D).

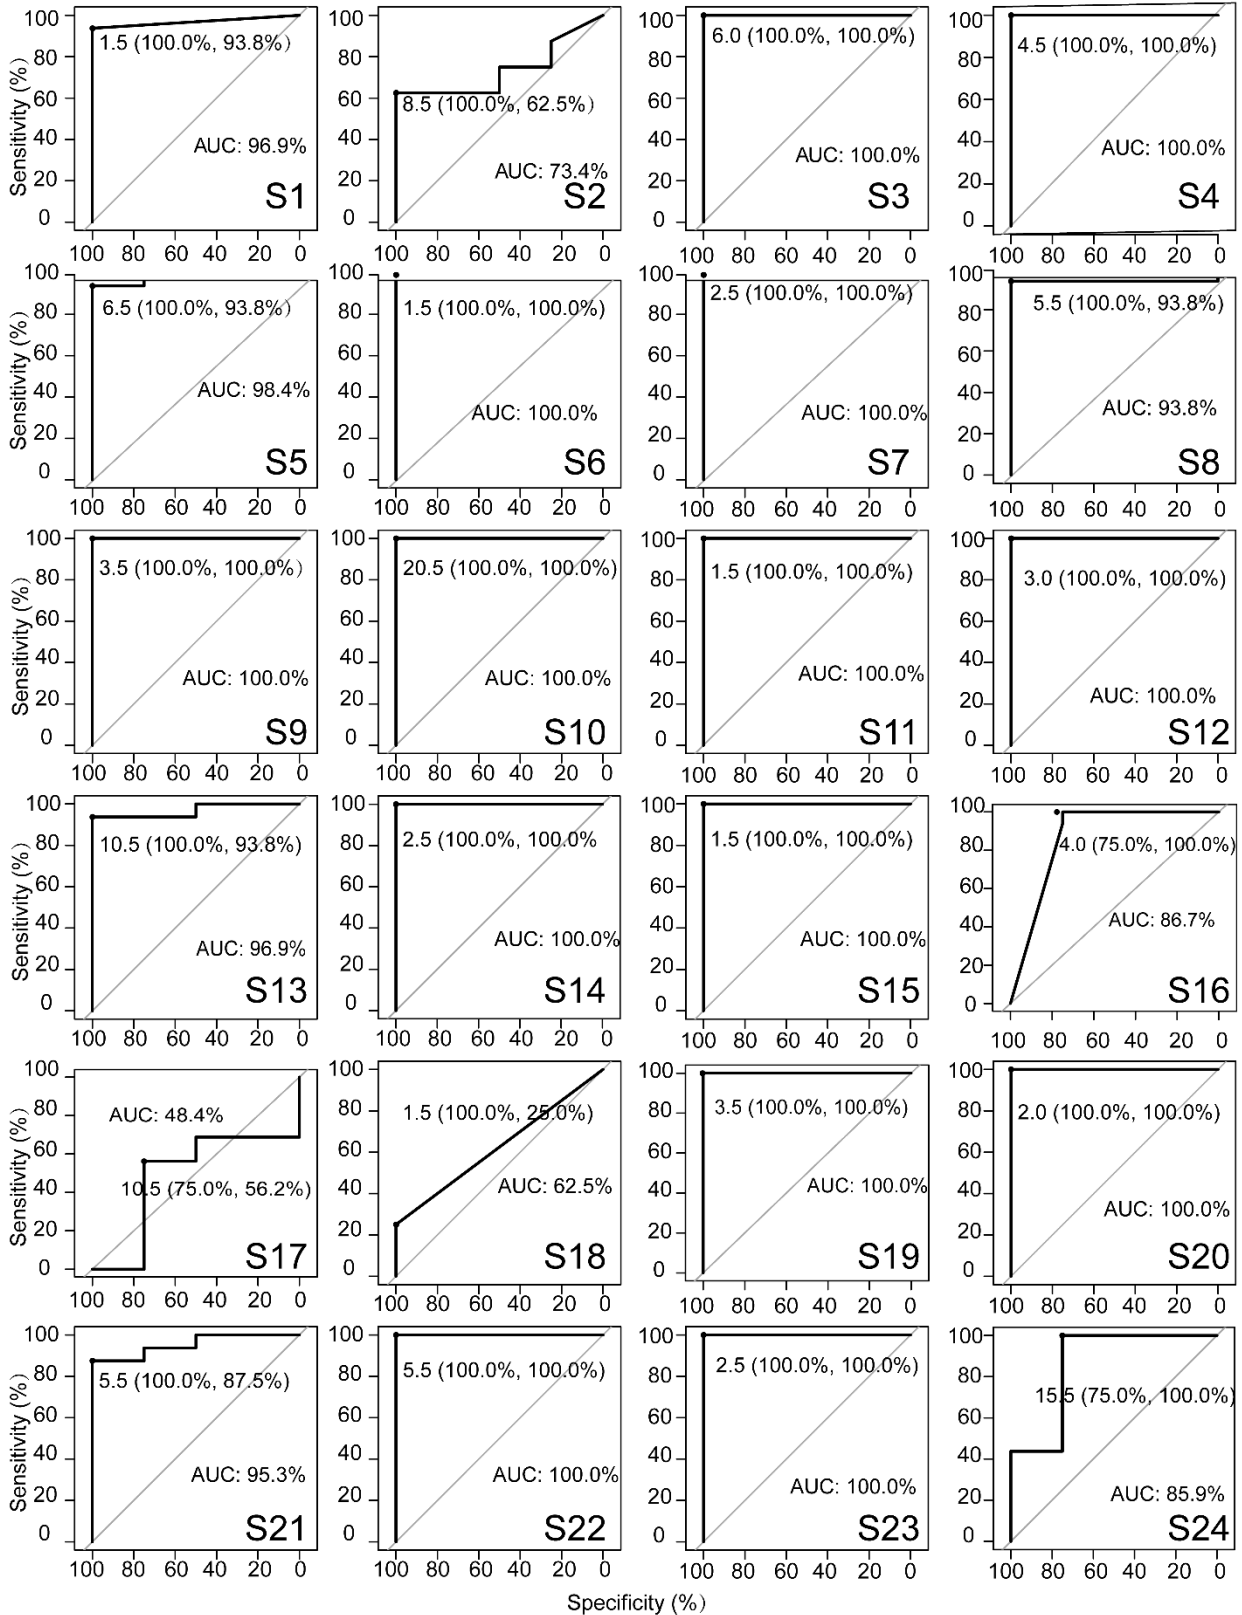

**Figure S25.** Estimation on the accuracy of all distinct metabolites to be biomarkers. All metabolites but S2, S16, S17, S18, S24 have the potential to be biomarkers with high diagnostic accuracy. AUC, Area Under Curve.
